# Supplementary material for: Gene expression and immune infiltration analysis comparing lesioned and preserved subchondral bone in osteoarthritis
Source: PeerJ journal article supplement (doi:10.7717/peerj.17417), 2024-05-28
Supplement: Lesioned_Preserved_DEGs.pdf [file Lesioned_Preserved_DEGs.pdf]

The DEGs between lesioned and preserved OA subchondral bone samples

|           | logFC    | AveExpr  | t        | P.Value  | adj.P.Val | B        | threshold |
|-----------|----------|----------|----------|----------|-----------|----------|-----------|
| STMN2     | 5.52924  | 2.039705 | 11.51624 | 1.43E-14 | 1.30E-11  | 23.0447  | Up        |
| POSTN     | 3.984087 | 0.39755  | 8.962735 | 2.68E-11 | 2.55E-09  | 15.67639 | Up        |
| IL11      | 3.845172 | 1.287127 | 12.60961 | 7.32E-16 | 3.05E-12  | 25.92805 | Up        |
| APCDD1L   | 3.296499 | 1.175285 | 9.306848 | 9.25E-12 | 1.26E-09  | 16.71951 | Up        |
| GPR179    | 3.037234 | 1.209642 | 4.868313 | 1.63E-05 | 0.000148  | 2.623896 | Up        |
| LINC0112I | 2.974385 | 1.090865 | 4.855777 | 1.70E-05 | 0.000153  | 2.584646 | Up        |
| SHISAL2B  | 2.931558 | 1.333555 | 9.433017 | 6.29E-12 | 9.11E-10  | 17.09825 | Up        |
| TUBB3     | 2.870688 | 0.723746 | 9.992425 | 1.16E-12 | 2.75E-10  | 18.75266 | Up        |
| COL6A3    | 2.852893 | 0.45138  | 8.746295 | 5.27E-11 | 4.34E-09  | 15.01294 | Up        |
| COL3A1    | 2.8005   | 0.878182 | 9.021411 | 2.23E-11 | 2.31E-09  | 15.85529 | Up        |
| CCL18     | 2.766157 | -0.82957 | 6.676276 | 4.25E-08 | 1.00E-06  | 8.439626 | Up        |
| OGN       | 2.759728 | 0.350664 | 6.44135  | 9.24E-08 | 1.89E-06  | 7.677398 | Up        |
| ASPN      | 2.699345 | 0.569304 | 7.081794 | 1.12E-08 | 3.25E-07  | 9.751539 | Up        |
| CD86      | 2.682729 | 0.880816 | 5.210938 | 5.37E-06 | 5.82E-05  | 3.706144 | Up        |
| CA12      | 2.648653 | 0.53113  | 7.867318 | 8.64E-10 | 3.93E-08  | 12.26553 | Up        |
| PPEF1     | 2.558825 | 0.607105 | 11.69058 | 8.81E-15 | 9.19E-12  | 23.51541 | Up        |
| DSG3      | 2.541686 | 0.593214 | 7.43717  | 3.49E-09 | 1.23E-07  | 10.89439 | Up        |
| OR52E8    | 2.516958 | 1.011523 | 4.824793 | 1.88E-05 | 0.000167  | 2.487746 | Up        |
| GDF6      | 2.500688 | 0.21454  | 7.156878 | 8.73E-09 | 2.64E-07  | 9.993632 | Up        |
| PPP6R1    | 2.455228 | 0.898734 | 5.259991 | 4.57E-06 | 5.08E-05  | 3.862393 | Up        |
| PBK       | 2.43476  | -0.12894 | 7.954157 | 6.53E-10 | 3.16E-08  | 12.54043 | Up        |
| ST6GAL2   | 2.434419 | 0.300472 | 8.436849 | 1.40E-10 | 9.35E-09  | 14.05502 | Up        |
| WNT16     | 2.427292 | 0.669225 | 8.418111 | 1.48E-10 | 9.54E-09  | 13.99668 | Up        |
| COL17A1   | 2.391769 | -0.77634 | 5.143174 | 6.70E-06 | 6.99E-05  | 3.490784 | Up        |
| DNER      | 2.389165 | -0.9484  | 4.775836 | 2.20E-05 | 0.000191  | 2.33499  | Up        |
| THBS4     | 2.370881 | 0.547943 | 5.885225 | 5.83E-07 | 9.03E-06  | 5.873384 | Up        |
| CENPA     | 2.355017 | -0.54086 | 5.225418 | 5.12E-06 | 5.59E-05  | 3.752238 | Up        |
| CRLF1     | 2.349998 | -0.0807  | 6.9621   | 1.66E-08 | 4.48E-07  | 9.365014 | Up        |
| MAGEB6    | 2.345898 | 0.870221 | 4.942996 | 1.28E-05 | 0.000121  | 2.858288 | Up        |
| KRT79     | 2.333695 | 1.039047 | 4.873791 | 1.61E-05 | 0.000146  | 2.641059 | Up        |
| CTHRC1    | 2.290157 | 0.537579 | 9.170671 | 1.41E-11 | 1.63E-09  | 16.30846 | Up        |
| ANLN      | 2.289481 | -0.64244 | 5.99728  | 4.02E-07 | 6.58E-06  | 6.236345 | Up        |
| SBSN      | 2.282121 | 0.401082 | 6.876252 | 2.20E-08 | 5.70E-07  | 9.087387 | Up        |
| KCNK2     | 2.277982 | 0.731951 | 8.428086 | 1.44E-10 | 9.41E-09  | 14.02774 | Up        |
| TNFSF11   | 2.239553 | 0.239769 | 11.06098 | 5.15E-14 | 2.83E-11  | 21.79582 | Up        |
| DIO2      | 2.228147 | 0.734601 | 8.537237 | 1.02E-10 | 7.22E-09  | 14.36696 | Up        |
| SOX11     | 2.201866 | 0.091473 | 6.636009 | 4.85E-08 | 1.12E-06  | 8.30905  | Up        |
| PAX1      | 2.17544  | -0.01298 | 7.280508 | 5.82E-09 | 1.85E-07  | 10.39155 | Up        |
| GRP       | 2.16941  | 0.684812 | 8.373659 | 1.71E-10 | 1.07E-08  | 13.85811 | Up        |
| ELMOD1    | 2.1499   | 0.159758 | 6.632757 | 4.91E-08 | 1.13E-06  | 8.298504 | Up        |
| SLC13A5   | 2.076457 | 0.456356 | 6.410147 | 1.02E-07 | 2.06E-06  | 7.576106 | Up        |
| RGS13     | 2.02141  | 0.073265 | 7.028344 | 1.33E-08 | 3.77E-07  | 9.579021 | Up        |
| PLEK2     | 2.015424 | 0.184114 | 7.09573  | 1.07E-08 | 3.14E-07  | 9.796497 | Up        |
| THY1      | 1.999365 | 0.678754 | 10.91524 | 7.81E-14 | 3.62E-11  | 21.38997 | Up        |
| LHX2      | 1.997352 | 0.58652  | 10.48743 | 2.69E-13 | 1.00E-10  | 20.18177 | Up        |
| BIRC5     | 1.988407 | -0.46902 | 6.961921 | 1.66E-08 | 4.48E-07  | 9.364436 | Up        |
| VSNL1     | 1.982443 | 0.415071 | 6.193494 | 2.10E-07 | 3.78E-06  | 6.872789 | Up        |
| CXADR     | 1.967638 | -0.0155  | 7.744244 | 1.29E-09 | 5.38E-08  | 11.87477 | Up        |
| RPA4      | 1.964793 | 0.892672 | 4.470842 | 5.82E-05 | 0.000434  | 1.394077 | Up        |
| TPSAB1    | 1.956416 | 0.018673 | 4.636463 | 3.44E-05 | 0.000278  | 1.902606 | Up        |
| FNDC1     | 1.954948 | 0.351819 | 7.697815 | 1.50E-09 | 6.04E-08  | 11.72702 | Up        |
| MMP13     | 1.954839 | -0.05952 | 4.057195 | 0.000211 | 0.001277  | 0.153927 | Up        |
| FAP       | 1.947366 | 0.579366 | 7.76997  | 1.18E-09 | 5.07E-08  | 11.95656 | Up        |
| FAM83D    | 1.944486 | -0.18779 | 4.705639 | 2.76E-05 | 0.00023   | 2.116738 | Up        |
| ECM1      | 1.939162 | 0.44642  | 6.793712 | 2.88E-08 | 7.20E-07  | 8.820183 | Up        |
| CPZ       | 1.922938 | -0.04516 | 5.845307 | 6.65E-07 | 1.01E-05  | 5.744208 | Up        |

|          |          |          |          |          |          |          |    |
|----------|----------|----------|----------|----------|----------|----------|----|
| NOX5     | 1.919679 | 0.81741  | 5.830344 | 6.99E-07 | 1.05E-05 | 5.695804 | Up |
| MEPE     | 1.91919  | -0.03507 | 8.597715 | 8.41E-11 | 6.33E-09 | 14.55434 | Up |
| PRSS35   | 1.910113 | 0.236831 | 5.850294 | 6.54E-07 | 9.93E-06 | 5.760339 | Up |
| PTGES    | 1.897438 | 0.359277 | 9.731783 | 2.54E-12 | 4.73E-10 | 17.98694 | Up |
| GAP43    | 1.894391 | 0.173235 | 7.532654 | 2.56E-09 | 9.49E-08 | 11.20002 | Up |
| S1PR3    | 1.87953  | -0.19498 | 8.643675 | 7.27E-11 | 5.62E-09 | 14.69647 | Up |
| CDKN2A-  | 1.877373 | 0.659554 | 6.809464 | 2.74E-08 | 6.91E-07 | 8.871194 | Up |
| ALPK2    | 1.874067 | 0.619883 | 7.796829 | 1.09E-09 | 4.72E-08 | 12.04189 | Up |
| LRR8E    | 1.873075 | 0.638571 | 8.401461 | 1.56E-10 | 9.95E-09 | 13.9448  | Up |
| FAM216B  | 1.860993 | 0.878543 | 5.137616 | 6.82E-06 | 7.09E-05 | 3.473146 | Up |
| TMEM158  | 1.858033 | 0.398577 | 6.257059 | 1.70E-07 | 3.17E-06 | 7.079113 | Up |
| FZD10    | 1.856497 | -0.12627 | 8.199881 | 2.97E-10 | 1.74E-08 | 13.31441 | Up |
| CEP55    | 1.849381 | 0.045564 | 8.803713 | 4.40E-11 | 3.74E-09 | 15.18948 | Up |
| VPS18    | 1.844865 | 0.810478 | 5.262019 | 4.54E-06 | 5.06E-05 | 3.868861 | Up |
| PGBD5    | 1.839652 | 0.425279 | 5.581112 | 1.59E-06 | 2.10E-05 | 4.891471 | Up |
| SLN      | 1.835322 | 0.368014 | 5.648675 | 1.27E-06 | 1.74E-05 | 5.109117 | Up |
| EDN2     | 1.828472 | 0.437578 | 6.015648 | 3.79E-07 | 6.26E-06 | 6.295882 | Up |
| INHBA    | 1.826887 | -0.17047 | 7.602168 | 2.04E-09 | 7.89E-08 | 11.42209 | Up |
| DIRAS1   | 1.816063 | 0.493495 | 10.33216 | 4.24E-13 | 1.38E-10 | 19.73706 | Up |
| OLFML2B  | 1.808664 | 0.227626 | 8.987016 | 2.49E-11 | 2.42E-09 | 15.75047 | Up |
| LINC0114 | 1.801453 | 0.339016 | 4.741412 | 2.46E-05 | 0.000209 | 2.227841 | Up |
| OPCML    | 1.791418 | 0.438047 | 5.22128  | 5.19E-06 | 5.65E-05 | 3.739064 | Up |
| LOC28373 | 1.786221 | 0.710277 | 5.125072 | 7.10E-06 | 7.31E-05 | 3.433352 | Up |
| LAMP5    | 1.785379 | 0.069529 | 9.22663  | 1.18E-11 | 1.47E-09 | 16.47765 | Up |
| PTCHD4   | 1.781937 | 0.815168 | 5.46885  | 2.30E-06 | 2.84E-05 | 4.530614 | Up |
| MSMP     | 1.775188 | 0.306364 | 3.464463 | 0.001238 | 0.005618 | -1.52692 | Up |
| AKR1B15  | 1.755258 | 0.69057  | 8.161106 | 3.36E-10 | 1.89E-08 | 13.19267 | Up |
| PCLAF    | 1.754714 | -0.30851 | 5.821695 | 7.19E-07 | 1.07E-05 | 5.667831 | Up |
| HIST1H1A | 1.750141 | 0.063309 | 7.354191 | 4.57E-09 | 1.52E-07 | 10.62826 | Up |
| SYT13    | 1.746276 | 0.468412 | 7.041429 | 1.28E-08 | 3.63E-07 | 9.621268 | Up |
| KDEL3    | 1.733534 | 0.400691 | 7.643894 | 1.78E-09 | 7.06E-08 | 11.55521 | Up |
| TK1      | 1.728704 | -0.46668 | 6.706775 | 3.84E-08 | 9.20E-07 | 8.538498 | Up |
| TMEM119  | 1.72199  | 0.288981 | 7.025962 | 1.34E-08 | 3.79E-07 | 9.57133  | Up |
| SPC25    | 1.718281 | -0.28092 | 6.505308 | 7.48E-08 | 1.60E-06 | 7.884998 | Up |
| TTK      | 1.715864 | -0.25862 | 5.960263 | 4.55E-07 | 7.28E-06 | 6.116391 | Up |
| SNORA73  | 1.710337 | 0.102613 | 5.760232 | 8.81E-07 | 1.27E-05 | 5.469157 | Up |
| PRSS23   | 1.705564 | 0.243533 | 7.657402 | 1.70E-09 | 6.81E-08 | 11.59827 | Up |
| SULT1B1  | 1.698329 | -0.35811 | 4.179847 | 0.000145 | 0.00093  | 0.516707 | Up |
| VWC2     | 1.692078 | 0.220891 | 5.358964 | 3.31E-06 | 3.86E-05 | 4.178489 | Up |
| HIST1H1B | 1.691223 | -0.35716 | 5.224712 | 5.13E-06 | 5.60E-05 | 3.749991 | Up |
| CLSPN    | 1.679406 | -0.14293 | 7.874813 | 8.44E-10 | 3.84E-08 | 12.28928 | Up |
| TOX3     | 1.674617 | 0.454825 | 7.441284 | 3.44E-09 | 1.22E-07 | 10.90757 | Up |
| TOP2A    | 1.670237 | -0.38259 | 4.052683 | 0.000214 | 0.001292 | 0.140669 | Up |
| GJA1     | 1.669353 | 0.361258 | 7.743702 | 1.29E-09 | 5.38E-08 | 11.87305 | Up |
| DKK3     | 1.665406 | 0.226144 | 8.997536 | 2.41E-11 | 2.38E-09 | 15.78255 | Up |
| EPYC     | 1.660829 | 0.485598 | 5.16023  | 6.33E-06 | 6.67E-05 | 3.544935 | Up |
| HOMER2   | 1.654209 | 0.467422 | 8.996589 | 2.41E-11 | 2.38E-09 | 15.77966 | Up |
| DLGAP5   | 1.653197 | -0.28259 | 5.641379 | 1.30E-06 | 1.77E-05 | 5.085598 | Up |
| FRMD7    | 1.6523   | 0.237649 | 5.129285 | 7.01E-06 | 7.24E-05 | 3.446716 | Up |
| LUM      | 1.641788 | 0.380307 | 7.956815 | 6.48E-10 | 3.15E-08 | 12.54883 | Up |
| CXCL13   | 1.640207 | 0.314525 | 6.106703 | 2.80E-07 | 4.82E-06 | 6.591168 | Up |
| SGMS2    | 1.63999  | 0.4173   | 6.935217 | 1.81E-08 | 4.83E-07 | 9.278111 | Up |
| LRRN1    | 1.637285 | -0.09373 | 6.032382 | 3.58E-07 | 5.96E-06 | 6.350133 | Up |
| CDKN3    | 1.633646 | -0.56558 | 6.718134 | 3.70E-08 | 8.95E-07 | 8.575317 | Up |
| S100A4   | 1.633169 | 0.099241 | 11.28661 | 2.72E-14 | 2.03E-11 | 22.41834 | Up |
| LRR2     | 1.627551 | 0.425705 | 5.65228  | 1.26E-06 | 1.72E-05 | 5.12074  | Up |
| ASPM     | 1.620572 | -0.32251 | 5.624791 | 1.38E-06 | 1.85E-05 | 5.03214  | Up |
| TNNT3    | 1.619863 | 0.625903 | 5.132515 | 6.93E-06 | 7.18E-05 | 3.456962 | Up |

|           |          |          |          |          |          |          |    |
|-----------|----------|----------|----------|----------|----------|----------|----|
| NSG1      | 1.616391 | 0.594592 | 5.374407 | 3.14E-06 | 3.70E-05 | 4.227903 | Up |
| LINC0052I | 1.610503 | 0.22614  | 4.646093 | 3.34E-05 | 0.000271 | 1.932359 | Up |
| IBSP      | 1.607565 | -0.16909 | 6.049157 | 3.39E-07 | 5.68E-06 | 6.404524 | Up |
| LINC0166  | 1.60565  | 0.645255 | 4.727054 | 2.57E-05 | 0.000217 | 2.183219 | Up |
| HJURP     | 1.602204 | -0.33494 | 5.319327 | 3.76E-06 | 4.30E-05 | 4.051771 | Up |
| CKM       | 1.598296 | 0.294153 | 4.687503 | 2.92E-05 | 0.000242 | 2.060505 | Up |
| GPRIN2    | 1.592351 | 0.346494 | 8.566914 | 9.26E-11 | 6.73E-09 | 14.45896 | Up |
| ARSI      | 1.592301 | 0.448669 | 7.456873 | 3.27E-09 | 1.17E-07 | 10.95751 | Up |
| TYMS      | 1.592034 | -0.33458 | 5.355511 | 3.34E-06 | 3.90E-05 | 4.167443 | Up |
| SKA3      | 1.589898 | -0.37049 | 4.361253 | 8.22E-05 | 0.000575 | 1.061088 | Up |
| LINC0083I | 1.588653 | 0.388715 | 9.467318 | 5.66E-12 | 8.44E-10 | 17.20087 | Up |
| PYCR1     | 1.588618 | 0.083597 | 7.89648  | 7.87E-10 | 3.68E-08 | 12.35792 | Up |
| CDCA2     | 1.587497 | -0.38852 | 5.790945 | 7.96E-07 | 1.17E-05 | 5.56841  | Up |
| LPAR4     | 1.582665 | 0.327398 | 5.494378 | 2.12E-06 | 2.66E-05 | 4.612577 | Up |
| GALNT14   | 1.572852 | 0.081175 | 6.721454 | 3.66E-08 | 8.88E-07 | 8.586075 | Up |
| LOC10013  | 1.566757 | 0.44148  | 9.899771 | 1.53E-12 | 3.23E-10 | 18.48149 | Up |
| GPR158    | 1.566154 | 0.519816 | 8.364888 | 1.76E-10 | 1.10E-08 | 13.83074 | Up |
| COL24A1   | 1.563164 | 0.42314  | 8.287581 | 2.25E-10 | 1.36E-08 | 13.58919 | Up |
| TPSD1     | 1.556235 | 0.025067 | 4.886837 | 1.54E-05 | 0.00014  | 2.681948 | Up |
| FAM155A   | 1.554579 | 0.296742 | 7.88861  | 8.07E-10 | 3.74E-08 | 12.333   | Up |
| REP15     | 1.547982 | 0.567561 | 6.218034 | 1.94E-07 | 3.53E-06 | 6.952438 | Up |
| RSPO4     | 1.543085 | 0.146093 | 9.18554  | 1.34E-11 | 1.59E-09 | 16.35346 | Up |
| SMOX      | 1.536984 | -0.0953  | 7.927708 | 7.11E-10 | 3.40E-08 | 12.45677 | Up |
| MATN4     | 1.534713 | 1.244662 | 3.342561 | 0.001754 | 0.007489 | -1.85526 | Up |
| TGFB3     | 1.532356 | 0.572779 | 7.863182 | 8.76E-10 | 3.97E-08 | 12.25242 | Up |
| GSDMC     | 1.531707 | 0.014791 | 5.407502 | 2.82E-06 | 3.38E-05 | 4.333884 | Up |
| CENPF     | 1.529265 | -0.26871 | 5.585263 | 1.57E-06 | 2.07E-05 | 4.904833 | Up |
| FKBP10    | 1.528483 | 0.222081 | 6.287333 | 1.54E-07 | 2.91E-06 | 7.177393 | Up |
| ADORA2B   | 1.528075 | 0.233232 | 9.004023 | 2.36E-11 | 2.38E-09 | 15.80232 | Up |
| COL5A2    | 1.525541 | 0.260747 | 7.484802 | 2.99E-09 | 1.07E-07 | 11.04693 | Up |
| KCNIP1    | 1.524898 | 0.69743  | 4.125242 | 0.000171 | 0.001071 | 0.354643 | Up |
| PDGFR1    | 1.521897 | 0.364793 | 6.15007  | 2.43E-07 | 4.28E-06 | 6.731868 | Up |
| SMPD3     | 1.521282 | 0.224023 | 5.266161 | 4.48E-06 | 5.00E-05 | 3.882068 | Up |
| ASPHD1    | 1.520238 | 0.371646 | 10.7788  | 1.16E-13 | 4.82E-11 | 21.00738 | Up |
| THBS2     | 1.517861 | 0.243991 | 5.746879 | 9.21E-07 | 1.32E-05 | 5.426022 | Up |
| HRASLS    | 1.515534 | 0.301917 | 7.384474 | 4.14E-09 | 1.41E-07 | 10.72543 | Up |
| BAMBI     | 1.511109 | 0.437903 | 7.840307 | 9.43E-10 | 4.19E-08 | 12.17988 | Up |
| KCNN4     | 1.51043  | 0.212303 | 8.333091 | 1.94E-10 | 1.20E-08 | 13.73147 | Up |
| RNF182    | 1.509577 | 0.064121 | 6.955252 | 1.69E-08 | 4.56E-07 | 9.342881 | Up |
| GALNT5    | 1.508716 | 0.260861 | 10.06439 | 9.37E-13 | 2.44E-10 | 18.96247 | Up |
| WNT2B     | 1.505234 | 0.557835 | 7.648718 | 1.75E-09 | 6.98E-08 | 11.57059 | Up |
| GNG4      | 1.505185 | 0.611228 | 5.8837   | 5.86E-07 | 9.07E-06 | 5.868446 | Up |
| SLC16A10  | 1.504293 | -0.52671 | 6.182645 | 2.18E-07 | 3.91E-06 | 6.83758  | Up |
| GPNMB     | 1.503344 | 0.048771 | 6.505562 | 7.47E-08 | 1.60E-06 | 7.885822 | Up |
| CCDC66    | 1.494262 | 0.664338 | 4.277958 | 0.000107 | 0.000717 | 0.810025 | Up |
| LRRC17    | 1.491226 | 0.399974 | 8.998656 | 2.40E-11 | 2.38E-09 | 15.78596 | Up |
| SCG5      | 1.488663 | 0.157933 | 7.883752 | 8.20E-10 | 3.76E-08 | 12.31761 | Up |
| S100A3    | 1.486339 | 0.254703 | 7.698342 | 1.49E-09 | 6.04E-08 | 11.7287  | Up |
| MELK      | 1.484519 | -0.04647 | 6.568601 | 6.07E-08 | 1.35E-06 | 8.090388 | Up |
| RHBDL2    | 1.484035 | 0.448453 | 6.400194 | 1.06E-07 | 2.11E-06 | 7.543793 | Up |
| DIRAS2    | 1.482575 | 0.319955 | 4.994755 | 1.09E-05 | 0.000105 | 3.021261 | Up |
| DAPL1     | 1.476234 | 0.413137 | 5.422439 | 2.68E-06 | 3.24E-05 | 4.38175  | Up |
| HIST1H2A  | 1.475096 | -0.17952 | 3.92596  | 0.000316 | 0.001786 | -0.22906 | Up |
| COL2A1    | 1.46927  | 0.298596 | 2.990426 | 0.004647 | 0.016432 | -2.76411 | Up |
| MMP11     | 1.463996 | 0.42459  | 7.013292 | 1.40E-08 | 3.92E-07 | 9.530413 | Up |
| HEY1      | 1.459218 | 0.483297 | 8.284278 | 2.27E-10 | 1.37E-08 | 13.57886 | Up |
| CLDN1     | 1.456768 | 0.61293  | 5.481525 | 2.21E-06 | 2.75E-05 | 4.571305 | Up |
| FRMPD4    | 1.45652  | 0.260397 | 8.41987  | 1.48E-10 | 9.54E-09 | 14.00216 | Up |

|          |          |          |          |          |          |          |    |
|----------|----------|----------|----------|----------|----------|----------|----|
| DLX4     | 1.452934 | 0.103861 | 6.11057  | 2.76E-07 | 4.78E-06 | 6.603712 | Up |
| CPXM1    | 1.447494 | -0.02208 | 8.49896  | 1.15E-10 | 7.96E-09 | 14.24815 | Up |
| SKA1     | 1.436209 | -0.09405 | 5.807617 | 7.53E-07 | 1.12E-05 | 5.622308 | Up |
| PRRX2    | 1.43259  | 0.213849 | 9.60621  | 3.71E-12 | 6.07E-10 | 17.61483 | Up |
| E2F8     | 1.432079 | -0.42371 | 3.378309 | 0.001584 | 0.006876 | -1.75966 | Up |
| BUB1     | 1.425928 | -0.14362 | 6.991793 | 1.50E-08 | 4.12E-07 | 9.460965 | Up |
| PPIC     | 1.424755 | 0.315838 | 8.063646 | 4.60E-10 | 2.46E-08 | 12.88602 | Up |
| UCN2     | 1.423805 | 0.416039 | 9.162031 | 1.45E-11 | 1.67E-09 | 16.28231 | Up |
| CDH2     | 1.419343 | 0.329003 | 6.867123 | 2.26E-08 | 5.82E-07 | 9.057845 | Up |
| PCDH20   | 1.418385 | 0.083804 | 6.829616 | 2.56E-08 | 6.51E-07 | 8.936445 | Up |
| COL11A1  | 1.415966 | 0.72662  | 3.032056 | 0.004153 | 0.014995 | -2.65994 | Up |
| MMP23B   | 1.414697 | 0.448255 | 5.346835 | 3.44E-06 | 3.98E-05 | 4.139693 | Up |
| DMP1     | 1.41183  | 0.101431 | 7.170144 | 8.36E-09 | 2.55E-07 | 10.03637 | Up |
| FAM19A5  | 1.410562 | 0.105501 | 5.697198 | 1.09E-06 | 1.52E-05 | 5.265625 | Up |
| TMEM132  | 1.41013  | 0.346862 | 4.600104 | 3.86E-05 | 0.000307 | 1.790456 | Up |
| ERMN     | 1.400232 | 0.154296 | 11.02267 | 5.75E-14 | 2.99E-11 | 21.68942 | Up |
| TGFBI    | 1.398175 | 0.039642 | 5.939786 | 4.87E-07 | 7.71E-06 | 6.050056 | Up |
| AMTN     | 1.397985 | 0.950605 | 3.544598 | 0.000981 | 0.004627 | -1.30756 | Up |
| SOST     | 1.396973 | -0.16603 | 5.187805 | 5.79E-06 | 6.19E-05 | 3.632559 | Up |
| COMP     | 1.393828 | -0.12145 | 4.04039  | 0.000223 | 0.001336 | 0.104576 | Up |
| BASP1    | 1.390129 | -0.42952 | 6.081559 | 3.04E-07 | 5.19E-06 | 6.509608 | Up |
| HPGD     | 1.388503 | 0.049935 | 4.949615 | 1.26E-05 | 0.000119 | 2.879106 | Up |
| GPR1     | 1.385421 | 0.590503 | 3.530617 | 0.001022 | 0.004787 | -1.34602 | Up |
| CPA3     | 1.382805 | -0.02709 | 6.12699  | 2.62E-07 | 4.57E-06 | 6.656982 | Up |
| TMEM200  | 1.380154 | 0.364511 | 8.036488 | 5.01E-10 | 2.63E-08 | 12.80041 | Up |
| FKBP7    | 1.376032 | 0.162436 | 7.721558 | 1.38E-09 | 5.68E-08 | 11.8026  | Up |
| MYO3A    | 1.373652 | 0.264127 | 7.336715 | 4.84E-09 | 1.59E-07 | 10.57215 | Up |
| PRRX1    | 1.373002 | 0.321627 | 7.230601 | 6.85E-09 | 2.13E-07 | 10.23103 | Up |
| PLPPR3   | 1.372652 | -0.19445 | 8.71134  | 5.88E-11 | 4.74E-09 | 14.90528 | Up |
| NUSAP1   | 1.372115 | -0.24086 | 5.190296 | 5.74E-06 | 6.15E-05 | 3.64048  | Up |
| GPSM2    | 1.371519 | -0.22154 | 7.333016 | 4.90E-09 | 1.61E-07 | 10.56027 | Up |
| PRL      | 1.371134 | -0.11371 | 6.485532 | 7.99E-08 | 1.68E-06 | 7.820811 | Up |
| SLC16A3  | 1.370803 | -0.26809 | 7.888072 | 8.08E-10 | 3.74E-08 | 12.33129 | Up |
| MND1     | 1.369107 | -0.20752 | 7.6573   | 1.70E-09 | 6.81E-08 | 11.59795 | Up |
| OMD      | 1.364759 | 0.176286 | 6.044308 | 3.44E-07 | 5.75E-06 | 6.388803 | Up |
| TPBG     | 1.357412 | 0.29911  | 7.846047 | 9.26E-10 | 4.14E-08 | 12.19809 | Up |
| CD24     | 1.354805 | -0.25291 | 5.650428 | 1.27E-06 | 1.73E-05 | 5.114771 | Up |
| MATN3    | 1.352925 | -0.01588 | 4.25685  | 0.000114 | 0.000756 | 0.746695 | Up |
| GABRA1   | 1.35219  | 0.186865 | 4.799878 | 2.04E-05 | 0.000179 | 2.409951 | Up |
| AKR1B10  | 1.350477 | 0.296404 | 9.98626  | 1.18E-12 | 2.75E-10 | 18.73465 | Up |
| CCDC150  | 1.343935 | 0.080248 | 6.418545 | 9.97E-08 | 2.01E-06 | 7.603366 | Up |
| HIST2H3A | 1.342003 | -0.21019 | 3.408548 | 0.001453 | 0.0064   | -1.67834 | Up |
| ESCO2    | 1.340061 | -0.16273 | 6.779115 | 3.03E-08 | 7.52E-07 | 8.772905 | Up |
| KIF20A   | 1.33943  | -0.1303  | 7.883721 | 8.20E-10 | 3.76E-08 | 12.31751 | Up |
| BICC1    | 1.336209 | 0.609087 | 6.146154 | 2.46E-07 | 4.32E-06 | 6.719162 | Up |
| VCAN     | 1.335648 | -0.30019 | 8.644513 | 7.25E-11 | 5.62E-09 | 14.69906 | Up |
| SCG2     | 1.335069 | 0.240467 | 3.740544 | 0.000551 | 0.002858 | -0.76021 | Up |
| NDC80    | 1.333388 | -0.01066 | 7.557337 | 2.36E-09 | 8.87E-08 | 11.27892 | Up |
| CHEK1    | 1.332925 | -0.13331 | 7.717212 | 1.40E-09 | 5.74E-08 | 11.78877 | Up |
| ZCCHC13  | 1.327228 | 0.664233 | 3.702913 | 0.000616 | 0.003144 | -0.86649 | Up |
| SNORA73  | 1.326864 | 0.054203 | 5.104891 | 7.59E-06 | 7.75E-05 | 3.369381 | Up |
| SPOCD1   | 1.325747 | 0.293747 | 5.501238 | 2.07E-06 | 2.60E-05 | 4.634614 | Up |
| PANX3    | 1.325219 | 0.454533 | 6.150691 | 2.42E-07 | 4.28E-06 | 6.733885 | Up |
| CCNB2    | 1.323719 | -0.22858 | 5.548906 | 1.77E-06 | 2.30E-05 | 4.78784  | Up |
| SLC9A2   | 1.322572 | 0.389164 | 4.647926 | 3.32E-05 | 0.000269 | 1.938023 | Up |
| TSPAN2   | 1.316246 | 0.022464 | 4.51334  | 5.09E-05 | 0.000387 | 1.523981 | Up |
| SLC20A2  | 1.31387  | 0.507511 | 7.739172 | 1.31E-09 | 5.44E-08 | 11.85864 | Up |
| CRABP2   | 1.312801 | 0.16379  | 6.108525 | 2.78E-07 | 4.81E-06 | 6.597078 | Up |

|          |          |          |          |          |          |          |    |
|----------|----------|----------|----------|----------|----------|----------|----|
| SYNDIG1  | 1.312445 | 0.238252 | 6.738532 | 3.46E-08 | 8.47E-07 | 8.64142  | Up |
| COL18A1  | 1.311137 | 0.363658 | 8.188131 | 3.08E-10 | 1.78E-08 | 13.27754 | Up |
| WFDC1    | 1.311254 | -0.04566 | 6.444662 | 9.14E-08 | 1.87E-06 | 7.688149 | Up |
| CENPM    | 1.309556 | -0.17199 | 6.520152 | 7.12E-08 | 1.54E-06 | 7.933171 | Up |
| CDT1     | 1.304577 | -0.26583 | 5.978332 | 4.28E-07 | 6.94E-06 | 6.174939 | Up |
| RPL39L   | 1.304317 | 0.251387 | 6.899355 | 2.04E-08 | 5.34E-07 | 9.162131 | Up |
| GLDC     | 1.302687 | 0.546166 | 6.586296 | 5.72E-08 | 1.29E-06 | 8.147795 | Up |
| ADAMTS1  | 1.301829 | -0.1994  | 5.381998 | 3.06E-06 | 3.63E-05 | 4.252202 | Up |
| P3H4     | 1.300552 | 0.44866  | 8.668001 | 6.74E-11 | 5.28E-09 | 14.7716  | Up |
| SLC8A3   | 1.299099 | 0.398382 | 5.379896 | 3.09E-06 | 3.65E-05 | 4.245475 | Up |
| ANO5     | 1.298744 | 0.354424 | 4.881357 | 1.57E-05 | 0.000143 | 2.664769 | Up |
| XG       | 1.295815 | 0.226434 | 4.513415 | 5.09E-05 | 0.000387 | 1.52421  | Up |
| SERPINE2 | 1.29578  | 0.222469 | 7.743262 | 1.29E-09 | 5.38E-08 | 11.87165 | Up |
| CCDC102f | 1.29505  | 0.314933 | 9.869519 | 1.68E-12 | 3.41E-10 | 18.39271 | Up |
| CDCA5    | 1.292932 | -0.24468 | 6.220064 | 1.92E-07 | 3.51E-06 | 6.959026 | Up |
| TNFRSF12 | 1.290453 | -0.01852 | 5.200258 | 5.56E-06 | 5.99E-05 | 3.672163 | Up |
| SRPX     | 1.29008  | -0.02369 | 6.006545 | 3.90E-07 | 6.43E-06 | 6.266374 | Up |
| COL1A2   | 1.287745 | 0.039384 | 5.671319 | 1.18E-06 | 1.63E-05 | 5.182134 | Up |
| GUCY1A2  | 1.285917 | 0.479785 | 7.847576 | 9.21E-10 | 4.14E-08 | 12.20294 | Up |
| TPST1    | 1.285004 | 0.349127 | 7.30733  | 5.33E-09 | 1.73E-07 | 10.47776 | Up |
| KRT12    | 1.284496 | 0.164952 | 7.56993  | 2.26E-09 | 8.57E-08 | 11.31915 | Up |
| ANGPT2   | 1.28404  | 0.046635 | 8.680088 | 6.49E-11 | 5.16E-09 | 14.8089  | Up |
| SHC3     | 1.283753 | 0.339985 | 7.164458 | 8.51E-09 | 2.58E-07 | 10.01806 | Up |
| UBE2C    | 1.279391 | -0.15367 | 6.7874   | 2.94E-08 | 7.33E-07 | 8.799741 | Up |
| BEND6    | 1.275263 | 0.310915 | 9.904889 | 1.51E-12 | 3.22E-10 | 18.4965  | Up |
| KBTBD13  | 1.273711 | 0.149099 | 8.111689 | 3.94E-10 | 2.19E-08 | 13.0373  | Up |
| KDEL2    | 1.271625 | 0.026672 | 7.384383 | 4.15E-09 | 1.41E-07 | 10.72514 | Up |
| ALPL     | 1.268083 | 0.416211 | 5.587269 | 1.56E-06 | 2.06E-05 | 4.911291 | Up |
| TMSB15A  | 1.264829 | 0.222357 | 7.647013 | 1.76E-09 | 7.00E-08 | 11.56515 | Up |
| TRDV2    | 1.259532 | 0.532822 | 4.293581 | 0.000102 | 0.000688 | 0.856977 | Up |
| METTL11E | 1.259241 | 0.114109 | 6.653998 | 4.57E-08 | 1.06E-06 | 8.367391 | Up |
| LRRC15   | 1.254793 | 0.534238 | 4.767055 | 2.26E-05 | 0.000195 | 2.307636 | Up |
| HTRA1    | 1.250635 | 0.390217 | 7.846976 | 9.23E-10 | 4.14E-08 | 12.20104 | Up |
| SYTL2    | 1.250401 | 0.402775 | 9.088365 | 1.81E-11 | 1.98E-09 | 16.05891 | Up |
| HMCN1    | 1.246694 | 0.422511 | 5.991179 | 4.10E-07 | 6.70E-06 | 6.216571 | Up |
| RAP1GAP  | 1.245373 | 0.334578 | 5.655714 | 1.24E-06 | 1.70E-05 | 5.131813 | Up |
| P4HA2    | 1.245152 | 0.257537 | 8.803964 | 4.40E-11 | 3.74E-09 | 15.19025 | Up |
| FRMD6    | 1.244898 | 0.240358 | 7.436791 | 3.49E-09 | 1.23E-07 | 10.89317 | Up |
| SLC51B   | 1.243516 | 0.47555  | 4.265348 | 0.000111 | 0.00074  | 0.772177 | Up |
| LPAR3    | 1.241387 | 0.369347 | 6.835895 | 2.51E-08 | 6.38E-07 | 8.956773 | Up |
| SERPINH1 | 1.238855 | 0.271586 | 9.739995 | 2.48E-12 | 4.70E-10 | 18.0112  | Up |
| KAZALD1  | 1.238023 | 0.199626 | 6.450672 | 8.96E-08 | 1.85E-06 | 7.70766  | Up |
| WISP1    | 1.235156 | 0.265983 | 6.636248 | 4.85E-08 | 1.12E-06 | 8.309828 | Up |
| NKD2     | 1.232976 | 0.326481 | 5.579374 | 1.60E-06 | 2.11E-05 | 4.885875 | Up |
| NDP      | 1.230626 | 0.494496 | 5.237144 | 4.93E-06 | 5.41E-05 | 3.789585 | Up |
| TNFAIP6  | 1.229418 | 0.018391 | 6.194423 | 2.09E-07 | 3.77E-06 | 6.875804 | Up |
| EFNB3    | 1.227623 | 0.188927 | 6.025385 | 3.67E-07 | 6.08E-06 | 6.32745  | Up |
| F12      | 1.22574  | -0.22527 | 6.624446 | 5.04E-08 | 1.16E-06 | 8.271549 | Up |
| PPP1R14C | 1.222581 | 0.168107 | 5.362017 | 3.27E-06 | 3.83E-05 | 4.188255 | Up |
| UBE2T    | 1.220939 | -0.01801 | 7.40057  | 3.93E-09 | 1.35E-07 | 10.77706 | Up |
| MMP2     | 1.218718 | 0.189454 | 7.024899 | 1.35E-08 | 3.80E-07 | 9.567896 | Up |
| SLITRK6  | 1.217325 | 0.189076 | 8.086153 | 4.28E-10 | 2.33E-08 | 12.95692 | Up |
| TDO2     | 1.214115 | 0.011654 | 3.974088 | 0.000273 | 0.001586 | -0.08926 | Up |
| RCC1     | 1.213599 | -0.3152  | 8.599579 | 8.36E-11 | 6.32E-09 | 14.56011 | Up |
| GABRA6   | 1.211442 | 0.135606 | 5.706951 | 1.05E-06 | 1.48E-05 | 5.297103 | Up |
| EXO1     | 1.210309 | -0.15279 | 6.50366  | 7.52E-08 | 1.60E-06 | 7.87965  | Up |
| CGREF1   | 1.21024  | 0.336408 | 5.482137 | 2.21E-06 | 2.74E-05 | 4.573269 | Up |
| CYP27C1  | 1.207697 | 0.144549 | 5.896075 | 5.62E-07 | 8.76E-06 | 5.908506 | Up |

|          |          |          |          |          |          |          |    |
|----------|----------|----------|----------|----------|----------|----------|----|
| IFITM5   | 1.20751  | 0.389096 | 4.102757 | 0.000184 | 0.001136 | 0.288164 | Up |
| MIR181A1 | 1.206745 | 0.376196 | 5.508937 | 2.02E-06 | 2.55E-05 | 4.659349 | Up |
| HIST1H3B | 1.204927 | -0.15461 | 3.760468 | 0.000519 | 0.002722 | -0.70373 | Up |
| AEBP1    | 1.204627 | 0.195423 | 5.701519 | 1.07E-06 | 1.50E-05 | 5.279571 | Up |
| B3GALT2  | 1.200327 | 0.403242 | 6.457774 | 8.75E-08 | 1.81E-06 | 7.730711 | Up |
| RAD54L   | 1.199314 | -0.13445 | 6.523158 | 7.05E-08 | 1.52E-06 | 7.942927 | Up |
| PHLDA1   | 1.198143 | 0.052401 | 5.402229 | 2.87E-06 | 3.43E-05 | 4.316989 | Up |
| JAKMIP2  | 1.198132 | 0.335075 | 6.234138 | 1.84E-07 | 3.38E-06 | 7.004708 | Up |
| MSMB     | 1.197561 | -0.03268 | 3.476268 | 0.001196 | 0.005457 | -1.49477 | Up |
| GJB2     | 1.191842 | 0.590268 | 4.322943 | 9.27E-05 | 0.000637 | 0.945391 | Up |
| SULF1    | 1.187977 | 0.290731 | 7.374964 | 4.27E-09 | 1.44E-07 | 10.69492 | Up |
| NUF2     | 1.185846 | -0.20229 | 5.989326 | 4.13E-07 | 6.74E-06 | 6.210567 | Up |
| GINS2    | 1.181465 | -0.00719 | 6.240722 | 1.80E-07 | 3.32E-06 | 7.026081 | Up |
| OSTCP1   | 1.179967 | 0.04807  | 7.995736 | 5.71E-10 | 2.92E-08 | 12.6718  | Up |
| HTRA3    | 1.178928 | -0.17294 | 5.831609 | 6.96E-07 | 1.04E-05 | 5.699896 | Up |
| KCNMA1   | 1.1782   | 0.040879 | 7.78177  | 1.14E-09 | 4.91E-08 | 11.99406 | Up |
| RS1      | 1.176685 | -0.02068 | 4.852067 | 1.72E-05 | 0.000154 | 2.573034 | Up |
| MIR31HG  | 1.176395 | 0.085591 | 6.7768   | 3.05E-08 | 7.56E-07 | 8.765405 | Up |
| FADS2    | 1.172541 | 0.15523  | 8.247123 | 2.56E-10 | 1.52E-08 | 13.46253 | Up |
| SUSD4    | 1.171625 | 0.197875 | 7.766506 | 1.20E-09 | 5.11E-08 | 11.94555 | Up |
| SHCBP1   | 1.171565 | -0.00952 | 4.99399  | 1.09E-05 | 0.000105 | 3.018849 | Up |
| ARNTL2   | 1.16967  | 0.158308 | 7.412597 | 3.78E-09 | 1.30E-07 | 10.81563 | Up |
| KIFC1    | 1.169137 | -0.07381 | 5.061206 | 8.75E-06 | 8.73E-05 | 3.231092 | Up |
| LINC0106 | 1.167209 | 0.570449 | 6.279066 | 1.58E-07 | 2.98E-06 | 7.150553 | Up |
| STXBP6   | 1.164404 | 0.267287 | 8.672451 | 6.64E-11 | 5.25E-09 | 14.78534 | Up |
| ATXN3L   | 1.163865 | 0.448289 | 4.556303 | 4.44E-05 | 0.000344 | 1.655723 | Up |
| GXYLT2   | 1.163301 | 0.266131 | 4.900505 | 1.47E-05 | 0.000136 | 2.724818 | Up |
| LOXL4    | 1.160137 | 0.391997 | 6.350442 | 1.25E-07 | 2.42E-06 | 7.382274 | Up |
| P3H1     | 1.157633 | 0.314202 | 9.191843 | 1.32E-11 | 1.58E-09 | 16.37252 | Up |
| RAB27B   | 1.153917 | -0.04429 | 8.440124 | 1.38E-10 | 9.28E-09 | 14.06522 | Up |
| HOXD10   | 1.149016 | -0.09475 | 7.813718 | 1.03E-09 | 4.50E-08 | 12.09551 | Up |
| CERCAM   | 1.148563 | 0.225045 | 8.542463 | 1.00E-10 | 7.12E-09 | 14.38317 | Up |
| TNP1     | 1.144357 | 0.29813  | 4.620969 | 3.61E-05 | 0.00029  | 1.854781 | Up |
| TMED3    | 1.144129 | -0.01518 | 7.844651 | 9.30E-10 | 4.15E-08 | 12.19366 | Up |
| LINC0218 | 1.141611 | -0.07776 | 3.365993 | 0.001641 | 0.007082 | -1.79266 | Up |
| PRR16    | 1.141047 | -0.0384  | 7.082715 | 1.11E-08 | 3.25E-07 | 9.75451  | Up |
| PROM2    | 1.140723 | 0.465742 | 4.662495 | 3.17E-05 | 0.000259 | 1.983075 | Up |
| WNT1     | 1.1407   | 0.465015 | 5.362694 | 3.27E-06 | 3.82E-05 | 4.190423 | Up |
| OR10G2   | 1.135384 | 0.6182   | 4.486994 | 5.53E-05 | 0.000416 | 1.4434   | Up |
| PAQR5    | 1.132833 | 0.026377 | 6.141021 | 2.50E-07 | 4.38E-06 | 6.702508 | Up |
| RAB15    | 1.131655 | -0.04688 | 7.422981 | 3.65E-09 | 1.28E-07 | 10.84891 | Up |
| CRABP1   | 1.126551 | 0.38986  | 3.154635 | 0.002969 | 0.011435 | -2.34797 | Up |
| CA9      | 1.124427 | -0.21613 | 4.764286 | 2.28E-05 | 0.000196 | 2.299014 | Up |
| KIF18A   | 1.122668 | -0.17644 | 3.719378 | 0.000587 | 0.003015 | -0.82005 | Up |
| NUDT11   | 1.122119 | -0.15996 | 4.731525 | 2.54E-05 | 0.000215 | 2.19711  | Up |
| CDK1     | 1.121559 | -0.09125 | 5.757313 | 8.90E-07 | 1.28E-05 | 5.459727 | Up |
| REEP1    | 1.120554 | 0.292629 | 7.906802 | 7.61E-10 | 3.59E-08 | 12.39061 | Up |
| ATP6V0D2 | 1.11964  | 0.11568  | 2.958228 | 0.005066 | 0.017652 | -2.84404 | Up |
| TREM2    | 1.118016 | 0.327897 | 3.917215 | 0.000324 | 0.001826 | -0.25438 | Up |
| LYPD1    | 1.116319 | 0.113803 | 7.103575 | 1.04E-08 | 3.09E-07 | 9.8218   | Up |
| KRT80    | 1.115877 | -0.01858 | 3.968762 | 0.000277 | 0.001605 | -0.10477 | Up |
| SERPIND1 | 1.115523 | 0.06215  | 3.696686 | 0.000627 | 0.003188 | -0.88402 | Up |
| OSTC     | 1.113832 | 0.025968 | 5.140813 | 6.75E-06 | 7.02E-05 | 3.483289 | Up |
| PCDH7    | 1.11301  | 0.107436 | 5.754857 | 8.97E-07 | 1.29E-05 | 5.451794 | Up |
| CD55     | 1.112814 | -0.24081 | 8.058722 | 4.67E-10 | 2.47E-08 | 12.8705  | Up |
| COL6A1   | 1.112636 | 0.394411 | 7.95727  | 6.47E-10 | 3.15E-08 | 12.55027 | Up |
| WNT5A    | 1.112317 | 0.706179 | 5.072302 | 8.44E-06 | 8.48E-05 | 3.266189 | Up |
| ALDH1L2  | 1.111566 | 0.378035 | 6.269794 | 1.63E-07 | 3.05E-06 | 7.120454 | Up |

|           |          |          |          |          |          |          |    |
|-----------|----------|----------|----------|----------|----------|----------|----|
| SEZ6L2    | 1.11121  | 0.331407 | 7.43225  | 3.55E-09 | 1.25E-07 | 10.87862 | Up |
| CPT1C     | 1.108385 | 0.18093  | 8.748056 | 5.24E-11 | 4.34E-09 | 15.01836 | Up |
| MYH7      | 1.107964 | 0.594314 | 2.438262 | 0.019073 | 0.050584 | -4.05142 | Up |
| HMMR      | 1.107472 | -0.03451 | 5.975288 | 4.33E-07 | 6.98E-06 | 6.165072 | Up |
| LCTL      | 1.106757 | 0.199759 | 6.546785 | 6.52E-08 | 1.43E-06 | 8.019599 | Up |
| RAD51     | 1.105661 | -0.1962  | 5.569945 | 1.65E-06 | 2.17E-05 | 4.855529 | Up |
| CD44      | 1.105222 | 0.030663 | 7.990992 | 5.80E-10 | 2.95E-08 | 12.65682 | Up |
| MCHR1     | 1.105197 | 0.186134 | 6.121417 | 2.67E-07 | 4.64E-06 | 6.638902 | Up |
| ADCYAP1   | 1.103848 | -0.15992 | 2.695396 | 0.010072 | 0.030597 | -3.47475 | Up |
| TMEM45A   | 1.103577 | 0.177412 | 6.841315 | 2.46E-08 | 6.29E-07 | 8.974316 | Up |
| CILP2     | 1.103375 | -0.3304  | 2.577538 | 0.013555 | 0.038688 | -3.74426 | Up |
| MT1G      | 1.100315 | 0.037463 | 4.287619 | 0.000104 | 0.000699 | 0.839051 | Up |
| E2F7      | 1.100132 | -0.16865 | 5.995291 | 4.05E-07 | 6.62E-06 | 6.2299   | Up |
| APOH      | 1.099144 | -0.41106 | 4.733488 | 2.52E-05 | 0.000214 | 2.20321  | Up |
| LINC01111 | 1.097153 | 0.309644 | 7.927953 | 7.11E-10 | 3.40E-08 | 12.45755 | Up |
| SNORD17   | 1.095962 | 0.15065  | 4.788321 | 2.11E-05 | 0.000184 | 2.373903 | Up |
| MSX1      | 1.095419 | 0.122517 | 6.711847 | 3.78E-08 | 9.09E-07 | 8.55494  | Up |
| CDC45     | 1.095295 | -0.22181 | 7.072364 | 1.15E-08 | 3.34E-07 | 9.721114 | Up |
| GLT8D2    | 1.094101 | 0.29367  | 8.007022 | 5.51E-10 | 2.85E-08 | 12.70744 | Up |
| COL7A1    | 1.092269 | 0.365493 | 5.752631 | 9.04E-07 | 1.30E-05 | 5.444601 | Up |
| LINC0092  | 1.09192  | 0.539234 | 3.990007 | 0.00026  | 0.001522 | -0.04285 | Up |
| MYBPC2    | 1.083497 | 0.024776 | 6.420325 | 9.91E-08 | 2.00E-06 | 7.609146 | Up |
| DSC1      | 1.082941 | 0.143362 | 3.080958 | 0.003635 | 0.013472 | -2.5364  | Up |
| ITGA11    | 1.080375 | 0.365085 | 6.510728 | 7.35E-08 | 1.58E-06 | 7.902587 | Up |
| CDCA3     | 1.079011 | -0.11396 | 7.299357 | 5.47E-09 | 1.76E-07 | 10.45213 | Up |
| PTTG1     | 1.076014 | -0.20692 | 5.233272 | 4.99E-06 | 5.47E-05 | 3.777251 | Up |
| HDC       | 1.07433  | -0.18158 | 4.382093 | 7.70E-05 | 0.000545 | 1.124184 | Up |
| KDEL1     | 1.074087 | 0.232372 | 7.664413 | 1.67E-09 | 6.70E-08 | 11.62062 | Up |
| DEUP1     | 1.072992 | 0.098917 | 4.594593 | 3.93E-05 | 0.000311 | 1.77348  | Up |
| ADAMDEC1  | 1.071917 | -0.02349 | 3.571855 | 0.000906 | 0.004324 | -1.23234 | Up |
| ERCC6L    | 1.068901 | -0.01993 | 3.537958 | 0.001    | 0.004702 | -1.32584 | Up |
| DCDC2     | 1.058491 | 0.276388 | 6.404545 | 1.04E-07 | 2.09E-06 | 7.557918 | Up |
| COX6A2    | 1.058061 | 0.094549 | 8.835812 | 3.98E-11 | 3.47E-09 | 15.28801 | Up |
| MLLT11    | 1.048925 | 0.16213  | 8.059038 | 4.66E-10 | 2.47E-08 | 12.8715  | Up |
| OR8K5     | 1.047108 | 0.004475 | 4.249848 | 0.000117 | 0.00077  | 0.725713 | Up |
| DIAPH3    | 1.047106 | -0.15919 | 6.594133 | 5.58E-08 | 1.26E-06 | 8.17322  | Up |
| PLAUR     | 1.044869 | -0.3503  | 4.885295 | 1.55E-05 | 0.000141 | 2.677112 | Up |
| PARD6G    | 1.044566 | 0.261741 | 6.535719 | 6.76E-08 | 1.47E-06 | 7.98369  | Up |
| PCOLCE    | 1.042605 | 0.161749 | 5.205174 | 5.47E-06 | 5.91E-05 | 3.687803 | Up |
| TEDC2     | 1.042467 | -0.1528  | 8.96144  | 2.69E-11 | 2.55E-09 | 15.67244 | Up |
| VAT1L     | 1.039892 | 0.329567 | 3.782289 | 0.000486 | 0.002582 | -0.6417  | Up |
| SOHLH2    | 1.038358 | 0.077826 | 6.139528 | 2.51E-07 | 4.40E-06 | 6.697664 | Up |
| MMP14     | 1.036424 | 0.298508 | 6.955412 | 1.69E-08 | 4.56E-07 | 9.343397 | Up |
| FGF11     | 1.035981 | -0.01107 | 7.720356 | 1.39E-09 | 5.70E-08 | 11.79878 | Up |
| CYS1      | 1.035659 | 0.367512 | 6.54062  | 6.65E-08 | 1.45E-06 | 7.999595 | Up |
| SQLE      | 1.034932 | 0.101565 | 7.960826 | 6.39E-10 | 3.13E-08 | 12.56151 | Up |
| PIMREG    | 1.033009 | 0.065961 | 6.663129 | 4.44E-08 | 1.04E-06 | 8.396999 | Up |
| LOX       | 1.032518 | 0.186306 | 6.226938 | 1.88E-07 | 3.45E-06 | 6.981341 | Up |
| PCSK1     | 1.032217 | 0.021077 | 5.254162 | 4.66E-06 | 5.17E-05 | 3.843812 | Up |
| C15orf48  | 1.031709 | 0.224029 | 4.424109 | 6.75E-05 | 0.000489 | 1.251718 | Up |
| LINC0051  | 1.029787 | 0.131724 | 2.47057  | 0.017637 | 0.047616 | -3.98129 | Up |
| KCNA4     | 1.028867 | 0.027958 | 4.824638 | 1.88E-05 | 0.000167 | 2.487262 | Up |
| GPX7      | 1.028495 | 0.151334 | 8.17149  | 3.25E-10 | 1.84E-08 | 13.22529 | Up |
| COL16A1   | 1.027912 | 0.25949  | 8.233049 | 2.67E-10 | 1.57E-08 | 13.41843 | Up |
| C1QTNF6   | 1.025721 | 0.239389 | 8.430424 | 1.43E-10 | 9.41E-09 | 14.03502 | Up |
| MS4A15    | 1.024044 | -0.01254 | 5.44404  | 2.50E-06 | 3.05E-05 | 4.451012 | Up |
| GTSE1     | 1.023484 | -0.06724 | 6.111054 | 2.76E-07 | 4.78E-06 | 6.605283 | Up |
| CAPN6     | 1.023342 | 0.190106 | 5.193782 | 5.68E-06 | 6.11E-05 | 3.651565 | Up |

|           |          |          |          |          |          |          |      |
|-----------|----------|----------|----------|----------|----------|----------|------|
| TNFRSF11  | 1.022129 | -0.15573 | 4.403629 | 7.20E-05 | 0.000516 | 1.1895   | Up   |
| DOK5      | 1.020071 | 0.050646 | 11.01518 | 5.87E-14 | 2.99E-11 | 21.66859 | Up   |
| KCNS1     | 1.020039 | 0.440089 | 4.747393 | 2.41E-05 | 0.000206 | 2.246443 | Up   |
| ADAMTSL   | 1.018915 | 0.21028  | 5.413021 | 2.77E-06 | 3.32E-05 | 4.351568 | Up   |
| CTPS1     | 1.015845 | -0.29151 | 6.657244 | 4.53E-08 | 1.06E-06 | 8.377915 | Up   |
| GDF11     | 1.014044 | 0.176913 | 9.048422 | 2.05E-11 | 2.18E-09 | 15.9375  | Up   |
| PNMA2     | 1.01371  | 0.302032 | 3.870947 | 0.000373 | 0.002062 | -0.38792 | Up   |
| PTPRZ1    | 1.012503 | 0.30224  | 4.161801 | 0.000153 | 0.000973 | 0.463052 | Up   |
| RAB23     | 1.009635 | 0.179487 | 9.216091 | 1.22E-11 | 1.49E-09 | 16.44582 | Up   |
| COL12A1   | 1.008115 | 0.275269 | 4.870545 | 1.62E-05 | 0.000147 | 2.630887 | Up   |
| NPAS1     | 1.008047 | 0.186997 | 7.708617 | 1.44E-09 | 5.89E-08 | 11.76141 | Up   |
| BRIP1     | 1.007636 | -0.27135 | 3.030637 | 0.004169 | 0.015045 | -2.6635  | Up   |
| PAPSS2    | 1.007011 | -0.2261  | 4.035731 | 0.000226 | 0.001352 | 0.090912 | Up   |
| KIF23     | 1.006008 | -0.13641 | 6.1948   | 2.09E-07 | 3.77E-06 | 6.877027 | Up   |
| HAS2      | 1.005874 | -0.10455 | 5.308514 | 3.90E-06 | 4.43E-05 | 4.01723  | Up   |
| FN1       | 1.004951 | 0.390944 | 3.802912 | 0.000457 | 0.002453 | -0.58292 | Up   |
| COL9A1    | 1.003201 | 0.455295 | 4.60628  | 3.79E-05 | 0.000302 | 1.809487 | Up   |
| PDE10A    | 1.001333 | 0.170856 | 6.482905 | 8.06E-08 | 1.70E-06 | 7.812286 | Up   |
| CKAP4     | 1.000037 | 0.042387 | 6.600641 | 5.46E-08 | 1.24E-06 | 8.194333 | Up   |
| MYL9      | -1.00098 | 0.172968 | -7.23119 | 6.84E-09 | 2.13E-07 | 10.23294 | Down |
| RAB6B     | -1.00166 | 0.154095 | -6.33574 | 1.31E-07 | 2.52E-06 | 7.33454  | Down |
| TENT5C    | -1.00167 | -0.10851 | -5.9     | 5.55E-07 | 8.66E-06 | 5.921208 | Down |
| RNF141    | -1.00183 | 0.011458 | -8.11369 | 3.91E-10 | 2.18E-08 | 13.04361 | Down |
| EGFL6     | -1.00214 | 0.584623 | -2.05917 | 0.04572  | 0.100513 | -4.82052 | Down |
| PEX19     | -1.00218 | 0.161689 | -7.53181 | 2.56E-09 | 9.50E-08 | 11.19732 | Down |
| RBPMS     | -1.00241 | -0.05027 | -8.93721 | 2.90E-11 | 2.73E-09 | 15.59844 | Down |
| SGK2      | -1.00261 | -0.03282 | -5.80713 | 7.55E-07 | 1.12E-05 | 5.620724 | Down |
| GVINP1    | -1.00297 | 0.363684 | -5.53165 | 1.87E-06 | 2.39E-05 | 4.732358 | Down |
| NFKBID    | -1.00308 | 0.068294 | -5.45973 | 2.37E-06 | 2.91E-05 | 4.501357 | Down |
| PNPLA7    | -1.00465 | 0.348019 | -6.44483 | 9.14E-08 | 1.87E-06 | 7.688696 | Down |
| PIK3C2B   | -1.00472 | 0.28375  | -11.748  | 7.51E-15 | 8.87E-12 | 23.66956 | Down |
| TACC1     | -1.00475 | -0.15693 | -7.7653  | 1.20E-09 | 5.12E-08 | 11.9417  | Down |
| TCF7L1    | -1.00528 | 0.214804 | -7.41457 | 3.76E-09 | 1.30E-07 | 10.82194 | Down |
| DMRT3     | -1.00556 | 0.337168 | -4.99477 | 1.09E-05 | 0.000105 | 3.021313 | Down |
| GPT       | -1.00595 | -0.22452 | -6.6903  | 4.06E-08 | 9.65E-07 | 8.485085 | Down |
| IL25      | -1.0062  | 0.216317 | -7.0153  | 1.39E-08 | 3.90E-07 | 9.536906 | Down |
| SCN4A     | -1.00698 | 0.294765 | -8.42737 | 1.44E-10 | 9.41E-09 | 14.0255  | Down |
| ITLN1     | -1.00954 | 0.270186 | -3.00792 | 0.004433 | 0.015831 | -2.72044 | Down |
| CYP4Z2P   | -1.00983 | 0.382725 | -5.87567 | 6.02E-07 | 9.24E-06 | 5.842445 | Down |
| BAIAP3    | -1.01008 | 0.103792 | -4.83619 | 1.81E-05 | 0.000161 | 2.52336  | Down |
| ADAMTS5   | -1.01093 | 0.195565 | -7.45187 | 3.33E-09 | 1.19E-07 | 10.94149 | Down |
| TMEM131   | -1.01104 | -0.15391 | -9.50982 | 4.97E-12 | 7.57E-10 | 17.32781 | Down |
| TCN2      | -1.01142 | -0.05647 | -6.06698 | 3.19E-07 | 5.40E-06 | 6.46232  | Down |
| SRGAP3    | -1.01187 | 0.319305 | -4.93579 | 1.31E-05 | 0.000123 | 2.835647 | Down |
| PPP1R36   | -1.012   | 0.272853 | -7.51931 | 2.67E-09 | 9.82E-08 | 11.15735 | Down |
| MCAM      | -1.01232 | 0.09732  | -8.46664 | 1.27E-10 | 8.61E-09 | 14.14771 | Down |
| FAM153C   | -1.01346 | -0.25848 | -4.25237 | 0.000116 | 0.000765 | 0.733279 | Down |
| AQP11     | -1.01373 | 0.101641 | -6.14643 | 2.45E-07 | 4.32E-06 | 6.720061 | Down |
| TNS2      | -1.01397 | 0.05223  | -7.87973 | 8.30E-10 | 3.80E-08 | 12.30486 | Down |
| GZMA      | -1.01439 | 0.256802 | -5.93784 | 4.90E-07 | 7.75E-06 | 6.043753 | Down |
| LTBP2     | -1.01478 | 0.147865 | -5.94556 | 4.77E-07 | 7.59E-06 | 6.068767 | Down |
| FLYWCH1   | -1.01548 | -0.00915 | -8.03312 | 5.07E-10 | 2.65E-08 | 12.78977 | Down |
| CD300LG   | -1.0163  | 0.210576 | -8.02192 | 5.25E-10 | 2.73E-08 | 12.75446 | Down |
| PYGL      | -1.0173  | -0.4644  | -6.03729 | 3.52E-07 | 5.87E-06 | 6.366057 | Down |
| CD96      | -1.01831 | -0.22263 | -5.19369 | 5.68E-06 | 6.11E-05 | 3.651258 | Down |
| SH2D1B    | -1.01995 | 0.27281  | -4.70083 | 2.80E-05 | 0.000233 | 2.101829 | Down |
| PTGER4    | -1.02064 | 0.151015 | -6.63491 | 4.87E-08 | 1.13E-06 | 8.305478 | Down |
| C20orf197 | -1.02262 | -0.17012 | -5.80359 | 7.64E-07 | 1.13E-05 | 5.609284 | Down |



|           |          |          |          |          |          |          |      |
|-----------|----------|----------|----------|----------|----------|----------|------|
| SCRN2     | -1.02322 | 0.005685 | -6.5444  | 6.57E-08 | 1.43E-06 | 8.011857 | Down |
| GZMB      | -1.02335 | -0.02818 | -5.646   | 1.29E-06 | 1.74E-05 | 5.100486 | Down |
| TRIM50    | -1.02344 | 0.205779 | -9.07886 | 1.87E-11 | 2.02E-09 | 16.03003 | Down |
| LOC72986  | -1.02387 | -0.03129 | -7.72268 | 1.38E-09 | 5.68E-08 | 11.80618 | Down |
| DACH2     | -1.02393 | 0.356453 | -3.66218 | 0.000695 | 0.003466 | -0.98092 | Down |
| NNAT      | -1.02428 | 0.376054 | -4.5171  | 5.03E-05 | 0.000383 | 1.535502 | Down |
| SH3BGRL2  | -1.02613 | 0.060401 | -6.67774 | 4.23E-08 | 1.00E-06 | 8.444387 | Down |
| TMEM37    | -1.02686 | 0.321406 | -6.42972 | 9.61E-08 | 1.95E-06 | 7.639646 | Down |
| CELF2     | -1.02707 | -0.14274 | -7.78735 | 1.12E-09 | 4.83E-08 | 12.01178 | Down |
| TSPYL2    | -1.02764 | -0.0485  | -5.42397 | 2.67E-06 | 3.23E-05 | 4.386642 | Down |
| H6PD      | -1.03107 | -0.26555 | -3.60556 | 0.000821 | 0.003988 | -1.13889 | Down |
| ZAP70     | -1.03111 | 0.368487 | -5.16405 | 6.26E-06 | 6.61E-05 | 3.557082 | Down |
| SMIM3     | -1.03188 | -0.30092 | -5.56678 | 1.67E-06 | 2.19E-05 | 4.845339 | Down |
| PLA2G16   | -1.03267 | 0.094278 | -5.94728 | 4.75E-07 | 7.56E-06 | 6.074334 | Down |
| TMEM88    | -1.03295 | 0.140133 | -7.41824 | 3.71E-09 | 1.29E-07 | 10.83371 | Down |
| AMOTL2    | -1.03375 | 0.234827 | -8.18649 | 3.10E-10 | 1.79E-08 | 13.27238 | Down |
| EZH1      | -1.03416 | 0.16877  | -8.5707  | 9.15E-11 | 6.68E-09 | 14.47068 | Down |
| CRY2      | -1.03614 | 0.105079 | -7.97112 | 6.19E-10 | 3.06E-08 | 12.59406 | Down |
| DOCK8     | -1.03672 | -0.04098 | -8.00512 | 5.55E-10 | 2.86E-08 | 12.70143 | Down |
| NR2F1-AS  | -1.03719 | 0.059742 | -7.06884 | 1.17E-08 | 3.36E-07 | 9.709728 | Down |
| ABCA10    | -1.03748 | 0.238869 | -8.38912 | 1.63E-10 | 1.03E-08 | 13.90634 | Down |
| CYP4F12   | -1.03767 | 0.11038  | -6.10448 | 2.82E-07 | 4.85E-06 | 6.583943 | Down |
| FGF2      | -1.03821 | 0.209533 | -4.77368 | 2.22E-05 | 0.000192 | 2.328275 | Down |
| MGAT3     | -1.03903 | -0.11676 | -8.50414 | 1.13E-10 | 7.88E-09 | 14.26423 | Down |
| HEBP2     | -1.03935 | 0.003346 | -5.94167 | 4.84E-07 | 7.67E-06 | 6.056171 | Down |
| DTHD1     | -1.03957 | 0.093534 | -3.11122 | 0.003346 | 0.012591 | -2.45934 | Down |
| PKNOX2    | -1.0401  | 0.131388 | -10.6979 | 1.46E-13 | 5.86E-11 | 20.77945 | Down |
| LAIR1     | -1.04073 | -0.18321 | -8.90865 | 3.17E-11 | 2.94E-09 | 15.51114 | Down |
| ELOVL7    | -1.04094 | -0.4112  | -4.73215 | 2.53E-05 | 0.000214 | 2.199067 | Down |
| AFF3      | -1.04126 | 0.084216 | -7.96452 | 6.32E-10 | 3.10E-08 | 12.5732  | Down |
| RNF157    | -1.04174 | -0.04942 | -8.97849 | 2.55E-11 | 2.45E-09 | 15.72445 | Down |
| RNF150    | -1.04214 | 0.366136 | -6.43113 | 9.56E-08 | 1.94E-06 | 7.644225 | Down |
| HRCT1     | -1.04231 | 0.336428 | -3.45292 | 0.001279 | 0.005772 | -1.55828 | Down |
| SORL1     | -1.04323 | -0.14792 | -8.79958 | 4.46E-11 | 3.74E-09 | 15.17678 | Down |
| OVOL1     | -1.04395 | 0.003315 | -6.47126 | 8.37E-08 | 1.75E-06 | 7.774498 | Down |
| BCL6      | -1.04401 | -0.06697 | -7.79519 | 1.09E-09 | 4.73E-08 | 12.03669 | Down |
| DKFZP586  | -1.0448  | -0.17738 | -5.87984 | 5.93E-07 | 9.16E-06 | 5.855966 | Down |
| LOXHD1    | -1.04529 | 0.092508 | -3.71059 | 0.000602 | 0.003083 | -0.84485 | Down |
| CEBPB-AS  | -1.04533 | 0.110458 | -7.9559  | 6.50E-10 | 3.15E-08 | 12.54595 | Down |
| SH3BP5    | -1.04634 | -0.23631 | -7.51275 | 2.73E-09 | 1.00E-07 | 11.13635 | Down |
| SHMT1     | -1.04707 | -0.23418 | -7.4784  | 3.05E-09 | 1.09E-07 | 11.02643 | Down |
| LINC00548 | -1.0472  | 0.109259 | -6.61738 | 5.16E-08 | 1.18E-06 | 8.248644 | Down |
| STEAP2    | -1.04746 | 0.073246 | -6.77474 | 3.07E-08 | 7.61E-07 | 8.758737 | Down |
| TC2N      | -1.04958 | -0.03006 | -6.97061 | 1.61E-08 | 4.38E-07 | 9.392524 | Down |
| GRPR      | -1.05041 | 0.395603 | -6.1968  | 2.08E-07 | 3.75E-06 | 6.883523 | Down |
| MAATS1    | -1.05078 | -0.17137 | -6.69918 | 3.94E-08 | 9.42E-07 | 8.513864 | Down |
| MAPK10    | -1.05114 | 0.351825 | -8.8969  | 3.29E-11 | 3.00E-09 | 15.47519 | Down |
| ACSL6     | -1.05338 | -0.01244 | -4.21983 | 0.000128 | 0.000836 | 0.635921 | Down |
| KIF1A     | -1.05371 | 0.245628 | -4.77597 | 2.20E-05 | 0.000191 | 2.335404 | Down |
| C6        | -1.05567 | 0.311689 | -3.36193 | 0.00166  | 0.007151 | -1.80354 | Down |
| NR3C2     | -1.05698 | 0.057931 | -7.08496 | 1.11E-08 | 3.23E-07 | 9.761768 | Down |
| RPS16P5   | -1.05821 | -0.05269 | -4.21962 | 0.000128 | 0.000836 | 0.635302 | Down |
| SLC14A1   | -1.05861 | 0.173745 | -4.45586 | 6.11E-05 | 0.000451 | 1.348382 | Down |
| ANKRD40   | -1.05963 | -0.02151 | -9.86844 | 1.68E-12 | 3.41E-10 | 18.38954 | Down |
| TXNIP     | -1.05969 | -0.08088 | -6.74007 | 3.44E-08 | 8.44E-07 | 8.646415 | Down |
| ADIRF     | -1.06077 | -0.02125 | -6.01007 | 3.86E-07 | 6.37E-06 | 6.277788 | Down |
| PRSS57    | -1.06259 | 0.027963 | -3.6686  | 0.000682 | 0.003407 | -0.96293 | Down |
| RADIL     | -1.06425 | 0.159491 | -8.38698 | 1.64E-10 | 1.04E-08 | 13.89967 | Down |

|           |          |          |          |          |          |          |      |
|-----------|----------|----------|----------|----------|----------|----------|------|
| MS4A4E    | -1.06448 | 0.105233 | -5.42685 | 2.64E-06 | 3.21E-05 | 4.395878 | Down |
| NEXMIF    | -1.0648  | -0.07121 | -6.96321 | 1.65E-08 | 4.47E-07 | 9.368603 | Down |
| NRBP2     | -1.0653  | 0.427434 | -5.26478 | 4.50E-06 | 5.02E-05 | 3.877653 | Down |
| CTSW      | -1.06773 | -0.23738 | -4.09114 | 0.00019  | 0.001169 | 0.253863 | Down |
| RSPO1     | -1.06879 | 0.501541 | -4.9377  | 1.31E-05 | 0.000123 | 2.841642 | Down |
| DGAT1     | -1.06946 | 0.053753 | -11.2024 | 3.45E-14 | 2.25E-11 | 22.18681 | Down |
| IDH1      | -1.06988 | 0.065685 | -5.66747 | 1.20E-06 | 1.65E-05 | 5.16973  | Down |
| KBTBD11   | -1.07002 | -0.11355 | -6.70974 | 3.80E-08 | 9.12E-07 | 8.548113 | Down |
| GPR88     | -1.07104 | -0.06249 | -7.00793 | 1.42E-08 | 3.96E-07 | 9.513089 | Down |
| NPY5R     | -1.07158 | 0.293369 | -8.48022 | 1.22E-10 | 8.31E-09 | 14.18993 | Down |
| MTTP      | -1.07299 | -0.03408 | -4.48736 | 5.53E-05 | 0.000416 | 1.444505 | Down |
| CST7      | -1.07426 | -0.34454 | -5.00517 | 1.05E-05 | 0.000102 | 3.054096 | Down |
| TMCC1     | -1.07455 | 0.288153 | -9.40663 | 6.82E-12 | 9.67E-10 | 17.01921 | Down |
| PLAT      | -1.07528 | 0.152065 | -6.5303  | 6.89E-08 | 1.50E-06 | 7.966093 | Down |
| CST6      | -1.07626 | 0.225539 | -6.74582 | 3.38E-08 | 8.30E-07 | 8.66504  | Down |
| PISD      | -1.07649 | -0.29895 | -5.41704 | 2.73E-06 | 3.29E-05 | 4.36446  | Down |
| SHISA3    | -1.07869 | -0.1384  | -5.98455 | 4.20E-07 | 6.83E-06 | 6.195089 | Down |
| IL12RB2   | -1.08008 | 0.181196 | -5.76021 | 8.81E-07 | 1.27E-05 | 5.469083 | Down |
| FGF14-AS  | -1.0801  | 0.043602 | -5.69938 | 1.08E-06 | 1.51E-05 | 5.27268  | Down |
| GATM      | -1.081   | 0.120862 | -5.3177  | 3.78E-06 | 4.32E-05 | 4.046586 | Down |
| CRHBP     | -1.08277 | 0.090093 | -4.36533 | 8.12E-05 | 0.000569 | 1.073439 | Down |
| VNN1      | -1.08285 | -0.04187 | -6.35557 | 1.23E-07 | 2.38E-06 | 7.398911 | Down |
| CX3CR1    | -1.08313 | 0.250316 | -6.37991 | 1.13E-07 | 2.23E-06 | 7.477944 | Down |
| RUNX1-IT  | -1.08472 | -0.12881 | -6.22244 | 1.91E-07 | 3.49E-06 | 6.966739 | Down |
| DHRS3     | -1.08541 | -0.19119 | -8.01401 | 5.39E-10 | 2.79E-08 | 12.7295  | Down |
| PRRT4     | -1.08674 | -0.56824 | -5.05841 | 8.83E-06 | 8.79E-05 | 3.222258 | Down |
| FGD4      | -1.0894  | -0.25221 | -8.55627 | 9.58E-11 | 6.89E-09 | 14.42597 | Down |
| SCN9A     | -1.08952 | 0.25114  | -6.2212  | 1.92E-07 | 3.50E-06 | 6.96273  | Down |
| CCDC88B   | -1.09181 | -0.01209 | -7.69851 | 1.49E-09 | 6.04E-08 | 11.72925 | Down |
| BANK1     | -1.09257 | 0.025334 | -8.19175 | 3.05E-10 | 1.78E-08 | 13.28889 | Down |
| GLYAT     | -1.09354 | 0.137916 | -6.60478 | 5.38E-08 | 1.22E-06 | 8.207765 | Down |
| EBI3      | -1.09394 | -0.14573 | -6.28579 | 1.55E-07 | 2.93E-06 | 7.172385 | Down |
| RERGL     | -1.09548 | 0.265891 | -4.57668 | 4.16E-05 | 0.000326 | 1.718353 | Down |
| BMS1P20   | -1.09605 | -0.14213 | -5.05165 | 9.02E-06 | 8.95E-05 | 3.20087  | Down |
| ANGPTL4   | -1.09636 | -0.27598 | -4.51721 | 5.03E-05 | 0.000383 | 1.535823 | Down |
| HSD11B1   | -1.09664 | 0.231038 | -3.42805 | 0.001374 | 0.006119 | -1.62569 | Down |
| PTGDS     | -1.09726 | 0.175091 | -5.45296 | 2.43E-06 | 2.97E-05 | 4.479636 | Down |
| LINC0098; | -1.09919 | 0.291687 | -5.55907 | 1.71E-06 | 2.23E-05 | 4.820544 | Down |
| TLR10     | -1.09936 | 0.064448 | -5.02941 | 9.70E-06 | 9.53E-05 | 3.130614 | Down |
| GPC5      | -1.10011 | 0.241917 | -5.27097 | 4.41E-06 | 4.93E-05 | 3.897413 | Down |
| HOXA3     | -1.10026 | 0.311449 | -10.0147 | 1.09E-12 | 2.67E-10 | 18.81762 | Down |
| ZDHHC11   | -1.10313 | 0.093268 | -7.50406 | 2.81E-09 | 1.02E-07 | 11.10856 | Down |
| CRYBG1    | -1.10463 | -0.0673  | -7.58129 | 2.18E-09 | 8.34E-08 | 11.35542 | Down |
| CLDND2    | -1.10784 | 0.105319 | -9.2169  | 1.22E-11 | 1.49E-09 | 16.44827 | Down |
| ATP8B4    | -1.10801 | -0.311   | -6.56707 | 6.10E-08 | 1.35E-06 | 8.085434 | Down |
| NCF1      | -1.10842 | 0.042319 | -7.55839 | 2.35E-09 | 8.85E-08 | 11.28229 | Down |
| CARD10    | -1.10865 | 0.135254 | -8.58857 | 8.65E-11 | 6.45E-09 | 14.52605 | Down |
| SERPINA1  | -1.10907 | 0.168854 | -3.96142 | 0.000283 | 0.001635 | -0.12614 | Down |
| TOGARAM   | -1.11011 | 0.227107 | -4.86227 | 1.67E-05 | 0.00015  | 2.604982 | Down |
| AGPAT2    | -1.11094 | -0.12075 | -7.12293 | 9.76E-09 | 2.91E-07 | 9.884201 | Down |
| EPB41     | -1.11105 | 0.063971 | -8.47899 | 1.22E-10 | 8.31E-09 | 14.18609 | Down |
| STK32A    | -1.11153 | 0.061825 | -6.99842 | 1.47E-08 | 4.05E-07 | 9.482377 | Down |
| GABRA2    | -1.11311 | 0.038755 | -5.55198 | 1.75E-06 | 2.28E-05 | 4.797717 | Down |
| FAXDC2    | -1.11454 | -0.01514 | -10.2145 | 6.00E-13 | 1.84E-10 | 19.3979  | Down |
| SHANK3    | -1.11516 | 0.20251  | -7.20734 | 7.40E-09 | 2.28E-07 | 10.15618 | Down |
| LOC10004  | -1.11551 | -0.00315 | -7.89186 | 7.98E-10 | 3.72E-08 | 12.34329 | Down |
| GDF10     | -1.11658 | 0.406411 | -5.45532 | 2.41E-06 | 2.95E-05 | 4.487182 | Down |
| GAB2      | -1.11689 | -0.1682  | -10.224  | 5.84E-13 | 1.82E-10 | 19.42547 | Down |

|          |          |          |          |          |          |          |      |
|----------|----------|----------|----------|----------|----------|----------|------|
| PSG8-AS1 | -1.11816 | 0.061392 | -7.0426  | 1.27E-08 | 3.63E-07 | 9.625041 | Down |
| PALM     | -1.11832 | 0.076711 | -7.95819 | 6.45E-10 | 3.15E-08 | 12.55317 | Down |
| FAH      | -1.1189  | -0.16313 | -8.07703 | 4.40E-10 | 2.39E-08 | 12.92817 | Down |
| ATP9A    | -1.12052 | 0.347577 | -7.63177 | 1.85E-09 | 7.28E-08 | 11.51655 | Down |
| SLC1A5   | -1.1211  | -0.3689  | -6.34391 | 1.28E-07 | 2.47E-06 | 7.361084 | Down |
| CES1     | -1.1229  | 0.263108 | -5.41584 | 2.74E-06 | 3.30E-05 | 4.360591 | Down |
| CFD      | -1.12508 | 0.123077 | -5.44904 | 2.46E-06 | 3.00E-05 | 4.467048 | Down |
| PDZRN4   | -1.12631 | 0.096599 | -5.49185 | 2.14E-06 | 2.68E-05 | 4.604456 | Down |
| RPL23AP3 | -1.12706 | 0.39491  | -8.16324 | 3.34E-10 | 1.88E-08 | 13.19938 | Down |
| MIR4697H | -1.12776 | 0.236229 | -5.48823 | 2.16E-06 | 2.70E-05 | 4.592826 | Down |
| LDHD     | -1.12936 | -0.09061 | -8.29384 | 2.20E-10 | 1.34E-08 | 13.60877 | Down |
| ADGRG6   | -1.12953 | 0.184665 | -6.67844 | 4.22E-08 | 9.99E-07 | 8.44665  | Down |
| ABCA5    | -1.13001 | 0.080278 | -9.35616 | 7.95E-12 | 1.12E-09 | 16.86779 | Down |
| ERN2     | -1.13097 | 0.176549 | -4.74833 | 2.40E-05 | 0.000205 | 2.249366 | Down |
| BMP5     | -1.13342 | 0.09396  | -6.24706 | 1.76E-07 | 3.26E-06 | 7.046651 | Down |
| WSCD1    | -1.1342  | 0.043058 | -5.56084 | 1.70E-06 | 2.22E-05 | 4.826231 | Down |
| PALMD    | -1.13468 | 0.1094   | -7.7451  | 1.28E-09 | 5.38E-08 | 11.87749 | Down |
| IGLL1    | -1.13536 | -0.25602 | -5.91159 | 5.34E-07 | 8.37E-06 | 5.958753 | Down |
| CRTAM    | -1.13758 | 0.23036  | -6.874   | 2.21E-08 | 5.72E-07 | 9.080091 | Down |
| CAV2     | -1.13886 | 0.093855 | -7.23253 | 6.81E-09 | 2.13E-07 | 10.23725 | Down |
| CEP295NL | -1.13999 | 0.264017 | -4.22467 | 0.000126 | 0.000825 | 0.650378 | Down |
| PRICKLE2 | -1.14085 | 0.101426 | -8.79927 | 4.46E-11 | 3.74E-09 | 15.17584 | Down |
| CNTN2    | -1.14131 | 0.160947 | -8.42782 | 1.44E-10 | 9.41E-09 | 14.02691 | Down |
| LINC0155 | -1.1418  | 0.478978 | -7.22471 | 6.99E-09 | 2.16E-07 | 10.21207 | Down |
| PHLDA3   | -1.14218 | -0.04275 | -8.1152  | 3.90E-10 | 2.18E-08 | 13.04836 | Down |
| AKR1C3   | -1.14298 | -0.08609 | -7.19495 | 7.70E-09 | 2.37E-07 | 10.11626 | Down |
| NIPSNAP3 | -1.14497 | 0.053947 | -7.4935  | 2.90E-09 | 1.05E-07 | 11.07478 | Down |
| ADRB2    | -1.14547 | 0.073454 | -6.80509 | 2.78E-08 | 6.96E-07 | 8.857036 | Down |
| LILRB5   | -1.14587 | -0.00434 | -6.51421 | 7.26E-08 | 1.56E-06 | 7.913882 | Down |
| MARK1    | -1.14629 | 0.232002 | -8.52316 | 1.06E-10 | 7.45E-09 | 14.3233  | Down |
| SCEL     | -1.1474  | 0.030523 | -5.32661 | 3.68E-06 | 4.22E-05 | 4.075045 | Down |
| B3GAT1   | -1.14996 | 0.369135 | -6.38237 | 1.12E-07 | 2.22E-06 | 7.485929 | Down |
| SYCP2L   | -1.15135 | 0.226527 | -6.10814 | 2.79E-07 | 4.81E-06 | 6.59584  | Down |
| GALNT15  | -1.15249 | -0.3079  | -5.53432 | 1.86E-06 | 2.38E-05 | 4.740929 | Down |
| HCG26    | -1.15351 | 0.169075 | -6.96749 | 1.63E-08 | 4.42E-07 | 9.382448 | Down |
| GPD1L    | -1.15387 | -0.12948 | -9.34822 | 8.15E-12 | 1.14E-09 | 16.84392 | Down |
| IGHG1    | -1.15387 | -0.32701 | -4.58166 | 4.10E-05 | 0.000322 | 1.733658 | Down |
| ZNF219   | -1.15576 | 0.217921 | -8.87504 | 3.52E-11 | 3.14E-09 | 15.40824 | Down |
| CXCR2P1  | -1.15705 | -0.03185 | -3.63559 | 0.000752 | 0.003698 | -1.05528 | Down |
| TRIB1    | -1.15784 | -0.12648 | -7.00459 | 1.44E-08 | 3.99E-07 | 9.502321 | Down |
| SIGLEC1  | -1.15833 | 0.25228  | -5.64437 | 1.29E-06 | 1.75E-05 | 5.095252 | Down |
| TRHDE    | -1.1596  | -0.12617 | -3.4192  | 0.00141  | 0.006247 | -1.6496  | Down |
| MIR3936H | -1.16023 | -0.02406 | -6.38539 | 1.11E-07 | 2.20E-06 | 7.495736 | Down |
| BEND7    | -1.16423 | -0.10175 | -11.0702 | 5.02E-14 | 2.83E-11 | 21.8215  | Down |
| TMEM236  | -1.16614 | 0.091948 | -7.30185 | 5.43E-09 | 1.75E-07 | 10.46015 | Down |
| ADRA2A   | -1.16682 | 0.146756 | -5.05669 | 8.87E-06 | 8.83E-05 | 3.216825 | Down |
| ESYT1    | -1.16701 | -0.05706 | -8.50297 | 1.13E-10 | 7.88E-09 | 14.2606  | Down |
| CSTA     | -1.16751 | -0.01165 | -5.64647 | 1.28E-06 | 1.74E-05 | 5.102015 | Down |
| PATL2    | -1.17334 | 0.132084 | -6.92828 | 1.85E-08 | 4.93E-07 | 9.255693 | Down |
| PTPRF    | -1.1748  | 0.367327 | -9.60333 | 3.74E-12 | 6.07E-10 | 17.60626 | Down |
| ARHGAP2  | -1.17524 | 0.157281 | -8.80182 | 4.43E-11 | 3.74E-09 | 15.18368 | Down |
| P2RY13   | -1.17649 | -0.08926 | -9.5448  | 4.47E-12 | 6.96E-10 | 17.4321  | Down |
| PECR     | -1.17661 | 0.232192 | -7.3745  | 4.28E-09 | 1.44E-07 | 10.69343 | Down |
| ITGB1BP1 | -1.17722 | 0.094946 | -6.42658 | 9.71E-08 | 1.97E-06 | 7.629446 | Down |
| ABLIM3   | -1.17823 | 0.076749 | -9.00934 | 2.32E-11 | 2.36E-09 | 15.81852 | Down |
| ATP6V0E2 | -1.17968 | 0.242876 | -8.16484 | 3.32E-10 | 1.88E-08 | 13.20441 | Down |
| CAP2     | -1.18351 | 0.255724 | -7.42628 | 3.62E-09 | 1.27E-07 | 10.8595  | Down |
| TBX21    | -1.18522 | 0.432642 | -6.94208 | 1.77E-08 | 4.73E-07 | 9.300285 | Down |

|          |          |          |          |          |          |          |      |
|----------|----------|----------|----------|----------|----------|----------|------|
| HLF      | -1.18584 | 0.131621 | -6.19742 | 2.07E-07 | 3.75E-06 | 6.88553  | Down |
| PRINS    | -1.18637 | 0.280446 | -9.0106  | 2.31E-11 | 2.36E-09 | 15.82234 | Down |
| SIK2     | -1.1878  | -0.23128 | -8.0996  | 4.09E-10 | 2.26E-08 | 12.99925 | Down |
| KLRF1    | -1.19017 | 0.445244 | -7.50879 | 2.76E-09 | 1.01E-07 | 11.12369 | Down |
| IL1B     | -1.1906  | 0.203999 | -3.92193 | 0.000319 | 0.001804 | -0.24074 | Down |
| DMRT2    | -1.19063 | -0.15557 | -7.26524 | 6.12E-09 | 1.93E-07 | 10.34245 | Down |
| PLD6     | -1.1917  | -0.02832 | -9.5652  | 4.20E-12 | 6.70E-10 | 17.49286 | Down |
| CCL14    | -1.19367 | -0.15956 | -5.04206 | 9.31E-06 | 9.20E-05 | 3.170561 | Down |
| 1-Sep    | -1.19461 | 0.256994 | -5.31451 | 3.82E-06 | 4.36E-05 | 4.036369 | Down |
| ASPA     | -1.19721 | 0.430928 | -7.09011 | 1.09E-08 | 3.18E-07 | 9.778357 | Down |
| FADS3    | -1.19778 | 0.0642   | -7.3554  | 4.56E-09 | 1.51E-07 | 10.63215 | Down |
| TFF3     | -1.19829 | -0.10034 | -4.70524 | 2.76E-05 | 0.000231 | 2.115487 | Down |
| COBLL1   | -1.19979 | 0.266405 | -8.53314 | 1.03E-10 | 7.29E-09 | 14.35424 | Down |
| CD69     | -1.20134 | 0.061707 | -3.37611 | 0.001594 | 0.00691  | -1.76555 | Down |
| ACO1     | -1.20208 | -0.01378 | -7.55852 | 2.35E-09 | 8.85E-08 | 11.2827  | Down |
| NKG7     | -1.20217 | -0.29252 | -5.35363 | 3.36E-06 | 3.92E-05 | 4.161422 | Down |
| EPHX1    | -1.20324 | 0.254428 | -6.807   | 2.76E-08 | 6.95E-07 | 8.863212 | Down |
| MTURN    | -1.20341 | 0.045683 | -8.65056 | 7.12E-11 | 5.56E-09 | 14.71775 | Down |
| MUM1L1   | -1.20378 | -0.10792 | -5.73289 | 9.65E-07 | 1.37E-05 | 5.380839 | Down |
| NMNAT3   | -1.20422 | -0.1747  | -7.99042 | 5.81E-10 | 2.95E-08 | 12.65501 | Down |
| LIN7A    | -1.21039 | -0.45221 | -6.65564 | 4.55E-08 | 1.06E-06 | 8.372726 | Down |
| LURAP1L  | -1.2108  | -0.00749 | -8.73574 | 5.45E-11 | 4.47E-09 | 14.98046 | Down |
| GKAP1    | -1.21413 | 0.036958 | -9.05071 | 2.04E-11 | 2.18E-09 | 15.94447 | Down |
| C1QTNF9  | -1.21442 | 0.41348  | -7.82026 | 1.01E-09 | 4.43E-08 | 12.11626 | Down |
| GZMH     | -1.21531 | 0.515734 | -4.80238 | 2.02E-05 | 0.000177 | 2.417745 | Down |
| STYK1    | -1.21532 | 0.133402 | -5.00102 | 1.06E-05 | 0.000103 | 3.041022 | Down |
| MEI1     | -1.21856 | -0.23812 | -6.66218 | 4.45E-08 | 1.04E-06 | 8.39393  | Down |
| HK2      | -1.21994 | -0.00424 | -7.33994 | 4.79E-09 | 1.58E-07 | 10.58249 | Down |
| ADCY5    | -1.22557 | -0.14223 | -8.73146 | 5.52E-11 | 4.52E-09 | 14.96726 | Down |
| CXCL3    | -1.22656 | -0.22314 | -4.96739 | 1.19E-05 | 0.000114 | 2.935033 | Down |
| SLC22A3  | -1.22659 | -0.31354 | -6.31327 | 1.41E-07 | 2.70E-06 | 7.26158  | Down |
| EMX2     | -1.22812 | 0.159863 | -7.37013 | 4.34E-09 | 1.46E-07 | 10.67942 | Down |
| SNX1     | -1.22889 | 0.164632 | -10.8978 | 8.21E-14 | 3.72E-11 | 21.34129 | Down |
| IER2     | -1.22891 | 0.578176 | -4.70307 | 2.78E-05 | 0.000232 | 2.108755 | Down |
| CXorf65  | -1.22948 | -0.10239 | -6.45474 | 8.84E-08 | 1.82E-06 | 7.720869 | Down |
| AKAP12   | -1.23063 | -0.07611 | -7.06651 | 1.17E-08 | 3.38E-07 | 9.702226 | Down |
| NSUN7    | -1.23203 | -0.00119 | -7.09885 | 1.06E-08 | 3.12E-07 | 9.806569 | Down |
| KL       | -1.23217 | 0.156725 | -6.65356 | 4.58E-08 | 1.06E-06 | 8.365977 | Down |
| RORC     | -1.23554 | -0.13312 | -6.56532 | 6.13E-08 | 1.36E-06 | 8.079747 | Down |
| FMO3     | -1.23623 | 0.128057 | -5.48416 | 2.19E-06 | 2.73E-05 | 4.579755 | Down |
| ANO3     | -1.23954 | 0.415331 | -7.41325 | 3.77E-09 | 1.30E-07 | 10.81771 | Down |
| ABCA6    | -1.23963 | 0.164902 | -8.55933 | 9.49E-11 | 6.87E-09 | 14.43545 | Down |
| FAM107A  | -1.2408  | 0.047854 | -5.58735 | 1.56E-06 | 2.06E-05 | 4.911552 | Down |
| NDRG2    | -1.24161 | -0.213   | -9.68923 | 2.89E-12 | 5.12E-10 | 17.86108 | Down |
| CBFA2T3  | -1.24555 | -0.20578 | -9.97287 | 1.23E-12 | 2.79E-10 | 18.69553 | Down |
| LINC0229 | -1.24634 | 0.241756 | -4.8197  | 1.91E-05 | 0.000169 | 2.47183  | Down |
| F11R     | -1.24895 | -0.22172 | -9.47027 | 5.61E-12 | 8.42E-10 | 17.20968 | Down |
| S100A12  | -1.25186 | -0.14641 | -2.41105 | 0.020365 | 0.053293 | -4.10996 | Down |
| JUND     | -1.25216 | 0.220361 | -4.92296 | 1.37E-05 | 0.000127 | 2.795316 | Down |
| SLAIN1   | -1.25654 | -0.33808 | -7.0325  | 1.31E-08 | 3.73E-07 | 9.592453 | Down |
| CP       | -1.26058 | -0.37694 | -6.43738 | 9.37E-08 | 1.91E-06 | 7.664501 | Down |
| STAP1    | -1.26294 | -0.55898 | -4.4282  | 6.66E-05 | 0.000485 | 1.264148 | Down |
| RBP7     | -1.26378 | -0.02112 | -7.85968 | 8.86E-10 | 4.01E-08 | 12.24131 | Down |
| CXCL8    | -1.2668  | -0.09065 | -2.08369 | 0.043317 | 0.096224 | -4.77389 | Down |
| SULT1A2  | -1.26974 | 0.215252 | -8.90326 | 3.23E-11 | 2.97E-09 | 15.49462 | Down |
| VXN      | -1.27005 | -0.10291 | -4.97761 | 1.15E-05 | 0.00011  | 2.967224 | Down |
| DAPK2    | -1.27054 | 0.143948 | -7.09188 | 1.08E-08 | 3.17E-07 | 9.784073 | Down |
| DMTN     | -1.27198 | -0.051   | -7.52085 | 2.66E-09 | 9.79E-08 | 11.16226 | Down |

|           |          |          |          |          |          |          |      |
|-----------|----------|----------|----------|----------|----------|----------|------|
| SYNM      | -1.27341 | 0.120906 | -9.25114 | 1.10E-11 | 1.42E-09 | 16.55162 | Down |
| ALDH1L1   | -1.27371 | -0.02297 | -7.84148 | 9.39E-10 | 4.19E-08 | 12.1836  | Down |
| GHR       | -1.27671 | -0.21111 | -9.22638 | 1.18E-11 | 1.47E-09 | 16.47689 | Down |
| SLC26A4   | -1.28168 | 0.094333 | -7.8992  | 7.80E-10 | 3.66E-08 | 12.36654 | Down |
| SPAAR     | -1.28267 | 0.047014 | -9.68317 | 2.94E-12 | 5.15E-10 | 17.84313 | Down |
| MMRN1     | -1.28341 | -0.47883 | -4.91321 | 1.41E-05 | 0.000131 | 2.764681 | Down |
| NPR1      | -1.28379 | 0.062736 | -9.88217 | 1.61E-12 | 3.34E-10 | 18.42985 | Down |
| DEFA4     | -1.28406 | -0.33366 | -2.21232 | 0.032442 | 0.076944 | -4.52208 | Down |
| MYH7B     | -1.28434 | 0.363898 | -10.3638 | 3.87E-13 | 1.32E-10 | 19.82805 | Down |
| ZNF831    | -1.28624 | 0.286444 | -5.88003 | 5.93E-07 | 9.16E-06 | 5.856579 | Down |
| STAC      | -1.2873  | 0.1006   | -5.63981 | 1.31E-06 | 1.77E-05 | 5.080526 | Down |
| ESM1      | -1.28999 | 0.204388 | -4.63663 | 3.44E-05 | 0.000278 | 1.903112 | Down |
| C6orf141  | -1.29116 | 0.134152 | -5.1862  | 5.82E-06 | 6.22E-05 | 3.627471 | Down |
| CLEC4GP1  | -1.29165 | 0.394301 | -4.68465 | 2.95E-05 | 0.000244 | 2.051654 | Down |
| PLCD4     | -1.2943  | 0.483894 | -8.17555 | 3.21E-10 | 1.83E-08 | 13.23803 | Down |
| HEPACAM   | -1.29432 | 0.009366 | -8.08986 | 4.22E-10 | 2.31E-08 | 12.96861 | Down |
| CMTM2     | -1.29661 | -0.15471 | -6.75484 | 3.28E-08 | 8.09E-07 | 8.694275 | Down |
| NR4A1     | -1.2976  | 0.092339 | -2.464   | 0.017921 | 0.048177 | -3.99562 | Down |
| CLIC6     | -1.29878 | 0.078843 | -7.73183 | 1.34E-09 | 5.54E-08 | 11.8353  | Down |
| FAM149A   | -1.29907 | 0.341141 | -9.42778 | 6.39E-12 | 9.19E-10 | 17.08256 | Down |
| NFKBIZ    | -1.30255 | 0.457255 | -4.4758  | 5.73E-05 | 0.000429 | 1.409203 | Down |
| ITGAL     | -1.30361 | 0.056452 | -6.13388 | 2.56E-07 | 4.47E-06 | 6.679325 | Down |
| GPR146    | -1.30555 | -0.16743 | -8.98529 | 2.50E-11 | 2.42E-09 | 15.7452  | Down |
| LYPLAL1-I | -1.30671 | 0.220659 | -5.29963 | 4.02E-06 | 4.54E-05 | 3.98885  | Down |
| CH25H     | -1.30794 | 0.404749 | -3.13341 | 0.003148 | 0.011972 | -2.40254 | Down |
| ABCA8     | -1.31113 | 0.359615 | -8.05171 | 4.77E-10 | 2.52E-08 | 12.84842 | Down |
| WIF1      | -1.31114 | 0.199757 | -7.23128 | 6.84E-09 | 2.13E-07 | 10.23321 | Down |
| INSYN2B   | -1.31148 | 0.046312 | -4.87876 | 1.58E-05 | 0.000144 | 2.656639 | Down |
| VENTX     | -1.31235 | 0.130573 | -9.01996 | 2.24E-11 | 2.31E-09 | 15.85086 | Down |
| ZNF385C   | -1.31565 | 0.081837 | -6.73649 | 3.48E-08 | 8.52E-07 | 8.634788 | Down |
| SCML2     | -1.31941 | -0.33925 | -8.42619 | 1.45E-10 | 9.41E-09 | 14.02185 | Down |
| CYP4Z1    | -1.32213 | 0.370563 | -10.8543 | 9.30E-14 | 4.04E-11 | 21.21937 | Down |
| HID1      | -1.32489 | 0.249518 | -7.5357  | 2.53E-09 | 9.43E-08 | 11.20977 | Down |
| HES1      | -1.3291  | 0.007638 | -6.71415 | 3.75E-08 | 9.03E-07 | 8.562404 | Down |
| SNN       | -1.33004 | 0.138652 | -9.91816 | 1.45E-12 | 3.15E-10 | 18.53541 | Down |
| AMY1C     | -1.33146 | 0.178468 | -8.27271 | 2.35E-10 | 1.41E-08 | 13.54266 | Down |
| CEACAM3   | -1.33327 | -0.3515  | -4.79897 | 2.04E-05 | 0.000179 | 2.407117 | Down |
| MGLL      | -1.33386 | 0.072459 | -9.73404 | 2.52E-12 | 4.73E-10 | 17.9936  | Down |
| SFRP1     | -1.33483 | 0.485989 | -5.30271 | 3.97E-06 | 4.50E-05 | 3.99871  | Down |
| PWRN1     | -1.33824 | 0.042414 | -4.48252 | 5.61E-05 | 0.000421 | 1.429743 | Down |
| GYG2      | -1.34096 | -0.03353 | -10.4422 | 3.07E-13 | 1.12E-10 | 20.05264 | Down |
| CAT       | -1.34137 | 0.002182 | -9.24937 | 1.10E-11 | 1.42E-09 | 16.5463  | Down |
| AMPD1     | -1.3414  | 0.264212 | -5.55385 | 1.74E-06 | 2.26E-05 | 4.80374  | Down |
| PARD6B    | -1.34748 | 0.02249  | -8.82224 | 4.15E-11 | 3.60E-09 | 15.24638 | Down |
| NMUR1     | -1.35128 | 0.477523 | -7.76117 | 1.22E-09 | 5.16E-08 | 11.9286  | Down |
| PNPLA2    | -1.35238 | -0.24417 | -10.0216 | 1.06E-12 | 2.67E-10 | 18.83776 | Down |
| FLJ34503  | -1.36514 | 0.244294 | -6.13657 | 2.54E-07 | 4.43E-06 | 6.688061 | Down |
| CXXC4     | -1.36523 | 0.323698 | -7.19087 | 7.81E-09 | 2.40E-07 | 10.10312 | Down |
| CDKN1C    | -1.37083 | 0.248773 | -10.1021 | 8.38E-13 | 2.33E-10 | 19.07223 | Down |
| BOK       | -1.37281 | -0.0548  | -8.89351 | 3.32E-11 | 3.02E-09 | 15.46482 | Down |
| SLITRK4   | -1.37326 | -0.05957 | -7.54711 | 2.44E-09 | 9.12E-08 | 11.24623 | Down |
| CTF1      | -1.37939 | 0.092661 | -10.7619 | 1.21E-13 | 4.97E-11 | 20.9597  | Down |
| CLSTN2    | -1.37998 | -0.14995 | -6.90369 | 2.01E-08 | 5.30E-07 | 9.176158 | Down |
| GPT2      | -1.38266 | -0.12778 | -9.03992 | 2.11E-11 | 2.22E-09 | 15.91165 | Down |
| CSRP2     | -1.38604 | 0.174259 | -7.59724 | 2.07E-09 | 8.00E-08 | 11.40636 | Down |
| LGALS12   | -1.38655 | -0.45972 | -6.68792 | 4.09E-08 | 9.71E-07 | 8.477388 | Down |
| FASN      | -1.38826 | -0.12661 | -8.0149  | 5.37E-10 | 2.79E-08 | 12.73231 | Down |
| PKD1L1    | -1.38939 | 0.406953 | -5.75263 | 9.04E-07 | 1.30E-05 | 5.444587 | Down |

|           |          |          |          |          |          |          |      |
|-----------|----------|----------|----------|----------|----------|----------|------|
| SHISA6    | -1.3925  | 0.131933 | -8.84397 | 3.88E-11 | 3.42E-09 | 15.31302 | Down |
| ATP1A2    | -1.39278 | 0.012355 | -8.05941 | 4.66E-10 | 2.47E-08 | 12.87268 | Down |
| DNASE1L3  | -1.39331 | -0.17907 | -8.10354 | 4.04E-10 | 2.24E-08 | 13.01167 | Down |
| APOD      | -1.4024  | -0.46347 | -3.6971  | 0.000627 | 0.003186 | -0.88285 | Down |
| HCRT2     | -1.40267 | 0.209702 | -5.83438 | 6.90E-07 | 1.04E-05 | 5.708874 | Down |
| FLJ30901  | -1.40557 | 0.129073 | -8.48475 | 1.20E-10 | 8.26E-09 | 14.204   | Down |
| ACSL1     | -1.40575 | -0.23353 | -6.95308 | 1.71E-08 | 4.58E-07 | 9.33587  | Down |
| WASF3     | -1.41118 | -0.05092 | -8.91163 | 3.14E-11 | 2.93E-09 | 15.52024 | Down |
| TTLL10    | -1.41238 | 0.309404 | -6.05126 | 3.36E-07 | 5.65E-06 | 6.41134  | Down |
| GZMK      | -1.41853 | 0.137654 | -7.24682 | 6.50E-09 | 2.04E-07 | 10.28322 | Down |
| FGF13     | -1.41991 | -0.16919 | -8.99038 | 2.46E-11 | 2.41E-09 | 15.76073 | Down |
| WFS1      | -1.4209  | -0.00055 | -8.43225 | 1.42E-10 | 9.41E-09 | 14.04069 | Down |
| ALDH2     | -1.42271 | 0.098227 | -8.46273 | 1.29E-10 | 8.69E-09 | 14.13556 | Down |
| ASXL3     | -1.42451 | 0.01547  | -7.48354 | 3.00E-09 | 1.08E-07 | 11.04289 | Down |
| TMOD1     | -1.42769 | -0.49294 | -7.9893  | 5.83E-10 | 2.95E-08 | 12.65149 | Down |
| KCNIP4    | -1.42992 | 0.159998 | -7.02    | 1.37E-08 | 3.86E-07 | 9.552071 | Down |
| CEBPA-D1  | -1.42997 | 0.338998 | -8.96827 | 2.63E-11 | 2.52E-09 | 15.69328 | Down |
| TWIST2    | -1.43279 | -0.01286 | -9.04692 | 2.06E-11 | 2.18E-09 | 15.93293 | Down |
| TM7SF2    | -1.43631 | -0.00091 | -9.23167 | 1.17E-11 | 1.47E-09 | 16.49288 | Down |
| TPPP      | -1.43696 | 0.250084 | -6.16483 | 2.31E-07 | 4.10E-06 | 6.77976  | Down |
| SLFN13    | -1.43945 | -0.02626 | -7.08085 | 1.12E-08 | 3.26E-07 | 9.748504 | Down |
| LINC00950 | -1.43999 | 0.247081 | -11.7835 | 6.82E-15 | 8.87E-12 | 23.76451 | Down |
| RBP4      | -1.44605 | -0.18803 | -8.08365 | 4.31E-10 | 2.35E-08 | 12.94905 | Down |
| SLC6A16   | -1.44648 | 0.179158 | -9.7216  | 2.62E-12 | 4.79E-10 | 17.95684 | Down |
| WDR86-A   | -1.45751 | -0.01675 | -7.57471 | 2.23E-09 | 8.49E-08 | 11.33441 | Down |
| DEPP1     | -1.45932 | -0.11754 | -6.44836 | 9.03E-08 | 1.86E-06 | 7.700151 | Down |
| PGM5-AS   | -1.46588 | 0.38343  | -7.33539 | 4.86E-09 | 1.60E-07 | 10.56789 | Down |
| SYTL3     | -1.47533 | -0.21211 | -9.71897 | 2.64E-12 | 4.79E-10 | 17.94907 | Down |
| CALB2     | -1.47971 | 0.13551  | -8.61124 | 8.06E-11 | 6.13E-09 | 14.59618 | Down |
| ACACB     | -1.48095 | 0.033215 | -9.46141 | 5.77E-12 | 8.51E-10 | 17.1832  | Down |
| PPP1R1A   | -1.48631 | 0.015678 | -8.03692 | 5.01E-10 | 2.63E-08 | 12.80177 | Down |
| TSTD1     | -1.49484 | -0.1227  | -9.2841  | 9.92E-12 | 1.32E-09 | 16.65099 | Down |
| TCF15     | -1.49604 | 0.229787 | -10.3542 | 3.98E-13 | 1.34E-10 | 19.80035 | Down |
| AR        | -1.49843 | 0.029225 | -9.83842 | 1.84E-12 | 3.69E-10 | 18.30131 | Down |
| BHMT2     | -1.50421 | 0.447702 | -7.90371 | 7.68E-10 | 3.62E-08 | 12.38083 | Down |
| ANKRD18   | -1.50666 | 0.018564 | -10.2259 | 5.81E-13 | 1.82E-10 | 19.43081 | Down |
| HCAR1     | -1.50744 | 0.089635 | -8.48406 | 1.20E-10 | 8.26E-09 | 14.20186 | Down |
| ANKRD20   | -1.51386 | -0.34461 | -7.83731 | 9.52E-10 | 4.23E-08 | 12.17038 | Down |
| RIC3      | -1.5163  | -0.13494 | -7.9489  | 6.64E-10 | 3.21E-08 | 12.5238  | Down |
| FYB2      | -1.51656 | 0.242963 | -4.21529 | 0.00013  | 0.000845 | 0.62235  | Down |
| CES1P1    | -1.51838 | 0.424217 | -3.51509 | 0.001069 | 0.004981 | -1.38865 | Down |
| ADHFE1    | -1.51992 | 0.099839 | -11.7966 | 6.57E-15 | 8.87E-12 | 23.79972 | Down |
| HOOK2     | -1.52023 | 0.170569 | -11.163  | 3.86E-14 | 2.44E-11 | 22.07819 | Down |
| MOGAT1    | -1.52461 | 0.052985 | -7.08987 | 1.09E-08 | 3.18E-07 | 9.777598 | Down |
| TNFRSF17  | -1.52834 | -0.25118 | -4.43393 | 6.54E-05 | 0.000477 | 1.281581 | Down |
| ZNF534    | -1.53129 | 0.360845 | -4.42384 | 6.75E-05 | 0.000489 | 1.250905 | Down |
| ANKRD20   | -1.53408 | 0.288566 | -5.06998 | 8.50E-06 | 8.53E-05 | 3.258845 | Down |
| PLCXD3    | -1.53664 | -0.27403 | -6.57007 | 6.04E-08 | 1.35E-06 | 8.095151 | Down |
| IGLJ3     | -1.54212 | -0.42507 | -3.59486 | 0.000847 | 0.004085 | -1.16862 | Down |
| SV2B      | -1.5432  | -0.09977 | -7.63056 | 1.86E-09 | 7.29E-08 | 11.5127  | Down |
| EGFEM1P   | -1.54383 | 0.403941 | -11.2704 | 2.85E-14 | 2.05E-11 | 22.37397 | Down |
| NXPE4     | -1.54825 | 0.140885 | -4.15065 | 0.000159 | 0.001001 | 0.429931 | Down |
| SEMA3G    | -1.55396 | 0.047629 | -9.20708 | 1.26E-11 | 1.52E-09 | 16.41857 | Down |
| EEDP1     | -1.55413 | 0.366556 | -10.1804 | 6.64E-13 | 1.92E-10 | 19.29925 | Down |
| IRX6      | -1.5551  | 0.560801 | -8.53138 | 1.04E-10 | 7.30E-09 | 14.34879 | Down |
| JUNB      | -1.56335 | 0.266617 | -4.2801  | 0.000106 | 0.000713 | 0.816472 | Down |
| MZB1      | -1.56576 | -0.47573 | -4.99208 | 1.09E-05 | 0.000106 | 3.012834 | Down |
| GPX3      | -1.56802 | -0.35487 | -7.80581 | 1.05E-09 | 4.61E-08 | 12.07042 | Down |

|           |          |          |          |          |          |          |      |
|-----------|----------|----------|----------|----------|----------|----------|------|
| LINC0255: | -1.57131 | 0.915065 | -3.80762 | 0.000451 | 0.002423 | -0.56949 | Down |
| FAM153B   | -1.57167 | -0.14463 | -4.11092 | 0.000179 | 0.001111 | 0.312284 | Down |
| NTRK2     | -1.57414 | 0.05384  | -12.2551 | 1.89E-15 | 4.37E-12 | 25.01098 | Down |
| IGHM      | -1.57515 | -0.61284 | -4.4256  | 6.72E-05 | 0.000488 | 1.256268 | Down |
| RAMP2-A   | -1.58142 | 0.522841 | -7.09162 | 1.08E-08 | 3.17E-07 | 9.783249 | Down |
| C2CD2     | -1.58993 | 0.003587 | -11.0994 | 4.62E-14 | 2.75E-11 | 21.9023  | Down |
| DTX1      | -1.59294 | -0.18529 | -8.59146 | 8.57E-11 | 6.41E-09 | 14.53497 | Down |
| MIR600HC  | -1.60318 | 0.051501 | -6.70535 | 3.86E-08 | 9.24E-07 | 8.533874 | Down |
| PRKAA2    | -1.6102  | 0.187886 | -6.27525 | 1.60E-07 | 3.01E-06 | 7.13816  | Down |
| FIGN      | -1.61532 | 0.239487 | -9.99436 | 1.15E-12 | 2.75E-10 | 18.75831 | Down |
| NMB       | -1.61678 | 0.155992 | -7.94611 | 6.70E-10 | 3.23E-08 | 12.51498 | Down |
| PLXNA4    | -1.61766 | 0.117183 | -10.1838 | 6.57E-13 | 1.92E-10 | 19.30909 | Down |
| AKR1C1    | -1.62264 | -0.13338 | -8.79964 | 4.46E-11 | 3.74E-09 | 15.17698 | Down |
| IGHD      | -1.62295 | -0.2821  | -5.2077  | 5.42E-06 | 5.87E-05 | 3.695834 | Down |
| SNCG      | -1.62731 | 0.53897  | -7.39425 | 4.01E-09 | 1.37E-07 | 10.7568  | Down |
| FZD4      | -1.6294  | -0.02341 | -12.3115 | 1.62E-15 | 4.23E-12 | 25.15808 | Down |
| ALPK3     | -1.62976 | 0.165775 | -14.0227 | 1.96E-17 | 2.04E-13 | 29.4182  | Down |
| POU2AF1   | -1.63354 | -0.46811 | -6.37339 | 1.16E-07 | 2.26E-06 | 7.456767 | Down |
| PTGER3    | -1.63552 | -0.05193 | -9.23465 | 1.16E-11 | 1.46E-09 | 16.50187 | Down |
| FGF13-AS  | -1.63589 | 0.103239 | -9.05563 | 2.01E-11 | 2.16E-09 | 15.95941 | Down |
| IGHV5-78  | -1.6395  | -0.16244 | -4.77457 | 2.21E-05 | 0.000191 | 2.331056 | Down |
| NQO1      | -1.64034 | 0.342892 | -7.31437 | 5.21E-09 | 1.70E-07 | 10.50038 | Down |
| GABRE     | -1.64832 | 0.152692 | -8.59169 | 8.57E-11 | 6.41E-09 | 14.53569 | Down |
| IGKC      | -1.65082 | -0.44162 | -4.96629 | 1.19E-05 | 0.000114 | 2.931593 | Down |
| ANKRD20.  | -1.65256 | 0.061917 | -10.6485 | 1.69E-13 | 6.51E-11 | 20.63955 | Down |
| CCL3L3    | -1.65607 | 0.5461   | -5.09449 | 7.85E-06 | 7.96E-05 | 3.336439 | Down |
| JCHAIN    | -1.65729 | 0.031496 | -5.47708 | 2.24E-06 | 2.78E-05 | 4.557023 | Down |
| RASD1     | -1.6591  | -0.30123 | -6.66709 | 4.38E-08 | 1.03E-06 | 8.409856 | Down |
| GPIHBP1   | -1.66292 | 0.152147 | -8.60367 | 8.25E-11 | 6.26E-09 | 14.57278 | Down |
| DACOR1    | -1.66297 | 0.561488 | -8.58309 | 8.80E-11 | 6.53E-09 | 14.50907 | Down |
| TNMD      | -1.66356 | 0.343821 | -7.57141 | 2.25E-09 | 8.56E-08 | 11.32386 | Down |
| IGLC1     | -1.67182 | -0.5378  | -4.5134  | 5.09E-05 | 0.000387 | 1.524172 | Down |
| SLC7A10   | -1.67322 | -0.2028  | -6.90053 | 2.03E-08 | 5.33E-07 | 9.165941 | Down |
| SYN2      | -1.67375 | -0.09349 | -8.64914 | 7.15E-11 | 5.56E-09 | 14.71334 | Down |
| SCNN1B    | -1.67892 | 0.03825  | -6.02546 | 3.66E-07 | 6.08E-06 | 6.327696 | Down |
| DIRC3     | -1.68605 | 0.704742 | -6.74738 | 3.36E-08 | 8.27E-07 | 8.670076 | Down |
| ANGPT1    | -1.68706 | 0.133569 | -8.54651 | 9.88E-11 | 7.06E-09 | 14.39571 | Down |
| CNTFR     | -1.69013 | -0.19307 | -8.38294 | 1.66E-10 | 1.05E-08 | 13.88705 | Down |
| DLEC1     | -1.69198 | 0.355353 | -9.19046 | 1.32E-11 | 1.58E-09 | 16.36834 | Down |
| PQLC2L    | -1.69215 | 0.064407 | -8.79787 | 4.48E-11 | 3.74E-09 | 15.17153 | Down |
| ABCD2     | -1.69392 | -0.10282 | -6.60103 | 5.45E-08 | 1.24E-06 | 8.195599 | Down |
| SSTR1     | -1.69439 | 0.003266 | -8.99954 | 2.39E-11 | 2.38E-09 | 15.78867 | Down |
| LEPR      | -1.69599 | 0.195068 | -10.9505 | 7.06E-14 | 3.43E-11 | 21.48846 | Down |
| CD36      | -1.70188 | 0.140371 | -8.69372 | 6.21E-11 | 4.99E-09 | 14.85095 | Down |
| ANKRD30.  | -1.7028  | 0.387148 | -6.8458  | 2.43E-08 | 6.21E-07 | 8.988819 | Down |
| MYO16     | -1.70432 | 0.085001 | -8.06129 | 4.63E-10 | 2.47E-08 | 12.87859 | Down |
| GNAZ      | -1.70623 | -0.11734 | -9.41952 | 6.55E-12 | 9.36E-10 | 17.05785 | Down |
| RSPO3     | -1.71528 | -0.16511 | -9.23669 | 1.15E-11 | 1.46E-09 | 16.50804 | Down |
| SLED1     | -1.71607 | -0.41623 | -5.54531 | 1.79E-06 | 2.31E-05 | 4.776272 | Down |
| MMD       | -1.72303 | -0.03108 | -7.27685 | 5.89E-09 | 1.87E-07 | 10.3798  | Down |
| PFKFB1    | -1.7314  | 0.089528 | -8.42945 | 1.43E-10 | 9.41E-09 | 14.032   | Down |
| NR2F1     | -1.73205 | -0.35752 | -7.69961 | 1.49E-09 | 6.04E-08 | 11.73275 | Down |
| EMX2OS    | -1.74127 | 0.342343 | -9.62311 | 3.53E-12 | 5.92E-10 | 17.66502 | Down |
| CRYAB     | -1.74272 | 0.010621 | -8.86699 | 3.61E-11 | 3.21E-09 | 15.3836  | Down |
| THRSP     | -1.75168 | -0.09779 | -8.18511 | 3.11E-10 | 1.79E-08 | 13.26804 | Down |
| C2CD4B    | -1.75263 | 0.612857 | -4.24772 | 0.000117 | 0.000775 | 0.719352 | Down |
| KCNQ1-A   | -1.75415 | 0.37122  | -10.162  | 7.01E-13 | 2.00E-10 | 19.24585 | Down |
| MEST      | -1.75736 | -0.2627  | -6.26767 | 1.64E-07 | 3.07E-06 | 7.113575 | Down |

|           |          |          |          |          |          |          |      |
|-----------|----------|----------|----------|----------|----------|----------|------|
| ITGA7     | -1.75828 | 0.088822 | -11.1494 | 4.01E-14 | 2.46E-11 | 22.04049 | Down |
| GRB14     | -1.76069 | 0.128745 | -11.8349 | 5.92E-15 | 8.82E-12 | 23.90187 | Down |
| RARRES2   | -1.76093 | -0.03796 | -10.0289 | 1.04E-12 | 2.65E-10 | 18.85921 | Down |
| PRXL2A    | -1.76195 | -0.17879 | -10.84   | 9.69E-14 | 4.13E-11 | 21.17927 | Down |
| PPARG     | -1.77864 | -0.2256  | -10.4041 | 3.44E-13 | 1.19E-10 | 19.9436  | Down |
| PAK5      | -1.78111 | 0.157609 | -6.92669 | 1.86E-08 | 4.95E-07 | 9.250526 | Down |
| CAVIN2    | -1.787   | -0.3947  | -7.93589 | 6.93E-10 | 3.32E-08 | 12.48266 | Down |
| CXCL2     | -1.78861 | 0.217174 | -4.82889 | 1.86E-05 | 0.000165 | 2.500561 | Down |
| ZBTB16    | -1.79383 | -0.03215 | -6.00543 | 3.92E-07 | 6.45E-06 | 6.262762 | Down |
| TNF       | -1.79545 | 0.757304 | -6.73166 | 3.54E-08 | 8.63E-07 | 8.619159 | Down |
| LRIG1     | -1.79872 | -0.05837 | -11.0186 | 5.81E-14 | 2.99E-11 | 21.67796 | Down |
| EGR2      | -1.80488 | 0.712392 | -4.96814 | 1.18E-05 | 0.000113 | 2.937399 | Down |
| C3        | -1.80689 | 0.013727 | -9.24937 | 1.10E-11 | 1.42E-09 | 16.54629 | Down |
| S100A8    | -1.81326 | -0.29264 | -4.45094 | 6.20E-05 | 0.000457 | 1.333376 | Down |
| IGHA2     | -1.81802 | -0.1782  | -5.01515 | 1.02E-05 | 9.95E-05 | 3.085606 | Down |
| EGR1      | -1.82165 | 0.680805 | -4.3576  | 8.32E-05 | 0.000581 | 1.050053 | Down |
| EPB41L4B  | -1.82482 | -0.18331 | -11.5595 | 1.27E-14 | 1.24E-11 | 23.16196 | Down |
| TUBB2B    | -1.83365 | 0.072466 | -7.12269 | 9.76E-09 | 2.91E-07 | 9.883448 | Down |
| KLHL30    | -1.83444 | 0.663602 | -9.29949 | 9.46E-12 | 1.27E-09 | 16.69736 | Down |
| INHBB     | -1.83856 | -0.13621 | -9.64085 | 3.34E-12 | 5.71E-10 | 17.71769 | Down |
| MFAP4     | -1.84392 | 0.161852 | -6.60633 | 5.36E-08 | 1.22E-06 | 8.21278  | Down |
| ANXA3     | -1.8449  | 0.005254 | -8.67432 | 6.60E-11 | 5.24E-09 | 14.79111 | Down |
| RETSAT    | -1.84753 | -0.23361 | -9.30178 | 9.40E-12 | 1.27E-09 | 16.70425 | Down |
| JUN       | -1.84846 | 0.485726 | -4.26095 | 0.000113 | 0.000748 | 0.758987 | Down |
| BBOX1     | -1.84973 | 0.229449 | -5.4603  | 2.37E-06 | 2.91E-05 | 4.503163 | Down |
| FABP9     | -1.85378 | -0.13389 | -8.33329 | 1.94E-10 | 1.20E-08 | 13.7321  | Down |
| TMEM56    | -1.85482 | -0.10385 | -9.80035 | 2.06E-12 | 4.06E-10 | 18.18927 | Down |
| BTG2      | -1.86301 | 0.055271 | -7.42259 | 3.66E-09 | 1.28E-07 | 10.84764 | Down |
| ANKRD20   | -1.86457 | 0.363853 | -9.21491 | 1.23E-11 | 1.49E-09 | 16.44225 | Down |
| LYVE1     | -1.8705  | -0.23178 | -7.6162  | 1.95E-09 | 7.59E-08 | 11.46686 | Down |
| APOBEC3   | -1.88546 | -0.35293 | -4.95375 | 1.24E-05 | 0.000118 | 2.892125 | Down |
| SORBS1    | -1.8939  | -0.05707 | -8.2458  | 2.57E-10 | 1.52E-08 | 13.45838 | Down |
| CHRD1     | -1.89419 | -0.1507  | -8.1346  | 3.66E-10 | 2.05E-08 | 13.10935 | Down |
| ZFP36     | -1.90061 | 0.56174  | -4.35411 | 8.41E-05 | 0.000586 | 1.039476 | Down |
| IRS2      | -1.90308 | -0.6029  | -11.8697 | 5.38E-15 | 8.63E-12 | 23.99472 | Down |
| ANGPTL8   | -1.90669 | 0.009733 | -5.54812 | 1.77E-06 | 2.30E-05 | 4.785317 | Down |
| IGLL5     | -1.9069  | -0.6267  | -4.89454 | 1.50E-05 | 0.000138 | 2.706112 | Down |
| TNS1      | -1.92292 | 0.030186 | -11.3369 | 2.36E-14 | 1.82E-11 | 22.55626 | Down |
| VIPR1     | -1.92543 | 0.179845 | -9.56271 | 4.24E-12 | 6.70E-10 | 17.48546 | Down |
| RGS6      | -1.93834 | -0.07049 | -8.45263 | 1.33E-10 | 8.95E-09 | 14.10413 | Down |
| MESP1     | -1.94554 | -0.15041 | -7.73563 | 1.32E-09 | 5.50E-08 | 11.84736 | Down |
| FRZB      | -1.9493  | 0.122463 | -9.89554 | 1.55E-12 | 3.24E-10 | 18.46909 | Down |
| CCL2      | -1.95448 | 0.533887 | -5.75946 | 8.84E-07 | 1.28E-05 | 5.466661 | Down |
| CAMP      | -1.95779 | -0.2351  | -2.70477 | 0.009834 | 0.030062 | -3.45295 | Down |
| PRKAR2B   | -1.96704 | -0.46945 | -7.90714 | 7.60E-10 | 3.59E-08 | 12.39168 | Down |
| BTNL9     | -1.9715  | 0.580848 | -10.0811 | 8.91E-13 | 2.38E-10 | 19.01122 | Down |
| 1-Mar     | -1.97276 | -0.28322 | -9.98471 | 1.19E-12 | 2.75E-10 | 18.73013 | Down |
| PPP1R9A   | -1.985   | 0.252075 | -13.2809 | 1.27E-16 | 6.64E-13 | 27.61845 | Down |
| SLC24A3   | -1.99807 | -0.11463 | -9.26232 | 1.06E-11 | 1.39E-09 | 16.58534 | Down |
| AOC3      | -2.01071 | -0.11082 | -11.2141 | 3.34E-14 | 2.25E-11 | 22.21899 | Down |
| KCNB1     | -2.02003 | 0.425024 | -10.9253 | 7.59E-14 | 3.60E-11 | 21.41806 | Down |
| AQP7P1    | -2.03342 | 0.138372 | -11.9151 | 4.75E-15 | 8.25E-12 | 24.11557 | Down |
| FGF23     | -2.05173 | 0.563034 | -6.52551 | 7.00E-08 | 1.51E-06 | 7.950562 | Down |
| TNFRSF13  | -2.05309 | -0.31295 | -6.64263 | 4.75E-08 | 1.10E-06 | 8.330513 | Down |
| GPAM      | -2.06325 | 0.23305  | -7.99278 | 5.77E-10 | 2.94E-08 | 12.66248 | Down |
| MYZAP     | -2.06513 | 0.048911 | -12.1435 | 2.55E-15 | 5.32E-12 | 24.71872 | Down |
| C14orf18C | -2.07386 | 0.247295 | -9.17307 | 1.40E-11 | 1.63E-09 | 16.31572 | Down |
| LGI1      | -2.07475 | 0.6946   | -6.10903 | 2.78E-07 | 4.80E-06 | 6.598706 | Down |



|         |          |          |          |          |          |          |      |
|---------|----------|----------|----------|----------|----------|----------|------|
| UTS2B   | -2.07705 | 0.296321 | -9.3077  | 9.23E-12 | 1.26E-09 | 16.72207 | Down |
| PDE3B   | -2.07959 | -0.53768 | -9.90425 | 1.51E-12 | 3.22E-10 | 18.49463 | Down |
| PLIN5   | -2.09355 | -0.09044 | -11.4985 | 1.50E-14 | 1.31E-11 | 22.99646 | Down |
| VWF     | -2.09483 | 0.303791 | -8.55306 | 9.68E-11 | 6.94E-09 | 14.41602 | Down |
| LUZP2   | -2.10282 | 0.588753 | -6.21086 | 1.98E-07 | 3.61E-06 | 6.929164 | Down |
| IRF4    | -2.10355 | -0.56293 | -7.75811 | 1.23E-09 | 5.20E-08 | 11.91885 | Down |
| PDE8B   | -2.10973 | -0.05237 | -9.51978 | 4.83E-12 | 7.40E-10 | 17.35753 | Down |
| ANKRD20 | -2.10999 | 0.02919  | -9.08155 | 1.85E-11 | 2.01E-09 | 16.0382  | Down |
| RDH5    | -2.11087 | 0.231091 | -9.02502 | 2.21E-11 | 2.29E-09 | 15.86629 | Down |
| TMC5    | -2.1109  | 0.017296 | -5.92908 | 5.04E-07 | 7.96E-06 | 6.01537  | Down |
| TSPAN8  | -2.11228 | 0.20959  | -12.3417 | 1.50E-15 | 4.23E-12 | 25.23651 | Down |
| SPON1   | -2.11295 | 0.075697 | -10.1905 | 6.44E-13 | 1.92E-10 | 19.32858 | Down |
| FAM30A  | -2.11345 | -0.08488 | -6.22832 | 1.87E-07 | 3.44E-06 | 6.985834 | Down |
| ACVR1C  | -2.11598 | -0.19044 | -7.88728 | 8.10E-10 | 3.74E-08 | 12.32877 | Down |
| MAL2    | -2.12421 | 0.389141 | -8.09312 | 4.18E-10 | 2.30E-08 | 12.97886 | Down |
| CCL4    | -2.13292 | 0.846986 | -5.14194 | 6.72E-06 | 7.01E-05 | 3.486874 | Down |
| TIMP4   | -2.13396 | -0.38591 | -8.91972 | 3.06E-11 | 2.87E-09 | 15.54498 | Down |
| SLC2A4  | -2.16642 | -0.55135 | -8.88166 | 3.45E-11 | 3.09E-09 | 15.42852 | Down |
| CEBPA   | -2.16768 | -0.1638  | -9.10527 | 1.72E-11 | 1.90E-09 | 16.11024 | Down |
| MAOA    | -2.17177 | -0.2027  | -9.50528 | 5.04E-12 | 7.62E-10 | 17.31427 | Down |
| MYOM1   | -2.18405 | 0.554181 | -9.80984 | 2.01E-12 | 3.99E-10 | 18.21721 | Down |
| LPL     | -2.18417 | -0.38659 | -9.10925 | 1.70E-11 | 1.90E-09 | 16.1223  | Down |
| DEFA3   | -2.18428 | -0.946   | -2.87225 | 0.006366 | 0.021191 | -3.0547  | Down |
| TTPA    | -2.20958 | 0.091514 | -7.07018 | 1.16E-08 | 3.36E-07 | 9.714078 | Down |
| HCAR3   | -2.21303 | -0.20303 | -8.67152 | 6.66E-11 | 5.25E-09 | 14.78248 | Down |
| MTLN    | -2.21507 | 0.825661 | -9.97919 | 1.21E-12 | 2.77E-10 | 18.714   | Down |
| GPD1    | -2.23988 | -0.33148 | -9.2762  | 1.02E-11 | 1.34E-09 | 16.62721 | Down |
| LVRN    | -2.24849 | 0.278198 | -10.0978 | 8.48E-13 | 2.33E-10 | 19.05969 | Down |
| MAOB    | -2.25055 | -0.24505 | -10.0151 | 1.09E-12 | 2.67E-10 | 18.8188  | Down |
| MRAP    | -2.2792  | -0.37032 | -7.9684  | 6.24E-10 | 3.08E-08 | 12.58545 | Down |
| CHRD12  | -2.28118 | 0.335748 | -5.70799 | 1.05E-06 | 1.47E-05 | 5.300446 | Down |
| FREM1   | -2.28549 | 0.344836 | -9.94228 | 1.35E-12 | 3.03E-10 | 18.60605 | Down |
| CIDECP1 | -2.31868 | -0.43413 | -9.56226 | 4.24E-12 | 6.70E-10 | 17.48412 | Down |
| FABP4   | -2.31922 | -0.35073 | -8.00412 | 5.56E-10 | 2.86E-08 | 12.69828 | Down |
| ITIH5   | -2.34784 | 0.135739 | -12.3615 | 1.42E-15 | 4.23E-12 | 25.28811 | Down |
| MAPT    | -2.35509 | 0.566838 | -10.5115 | 2.51E-13 | 9.52E-11 | 20.25044 | Down |
| KCTD8   | -2.36907 | 0.634611 | -7.04548 | 1.26E-08 | 3.60E-07 | 9.634361 | Down |
| SPOCK3  | -2.38583 | 0.456341 | -5.18662 | 5.81E-06 | 6.21E-05 | 3.628798 | Down |
| ADH1C   | -2.40246 | -0.40517 | -8.8003  | 4.45E-11 | 3.74E-09 | 15.17899 | Down |
| CADM2   | -2.40716 | 0.70322  | -8.5731  | 9.08E-11 | 6.65E-09 | 14.47814 | Down |
| CIDEC   | -2.40825 | -0.42783 | -9.15418 | 1.48E-11 | 1.70E-09 | 16.25853 | Down |
| ADIPOQ  | -2.42873 | -0.46805 | -7.52746 | 2.60E-09 | 9.61E-08 | 11.1834  | Down |
| TMEM255 | -2.44598 | 0.394208 | -8.17875 | 3.18E-10 | 1.82E-08 | 13.2481  | Down |
| TMEM132 | -2.48538 | -0.4358  | -11.7332 | 7.83E-15 | 8.87E-12 | 23.62979 | Down |
| OLFM4   | -2.50007 | -0.89166 | -5.89534 | 5.64E-07 | 8.78E-06 | 5.906119 | Down |
| MLXIPL  | -2.52891 | 0.078022 | -11.5472 | 1.31E-14 | 1.24E-11 | 23.12857 | Down |
| ANKRD20 | -2.55022 | 0.682994 | -8.05835 | 4.67E-10 | 2.47E-08 | 12.86933 | Down |
| P2RY14  | -2.59294 | 0.799479 | -9.29185 | 9.69E-12 | 1.30E-09 | 16.67434 | Down |
| CPA1    | -2.59993 | 0.603246 | -8.82522 | 4.12E-11 | 3.58E-09 | 15.25551 | Down |
| AQP7P2  | -2.61649 | -0.27307 | -10.2411 | 5.55E-13 | 1.78E-10 | 19.47486 | Down |
| SLC19A3 | -2.61717 | -0.43228 | -10.002  | 1.13E-12 | 2.74E-10 | 18.78049 | Down |
| ADRB1   | -2.6234  | -0.27838 | -9.92008 | 1.44E-12 | 3.15E-10 | 18.54102 | Down |
| CYP4X1  | -2.64278 | 0.627384 | -11.2269 | 3.22E-14 | 2.24E-11 | 22.25423 | Down |
| ACADL   | -2.6475  | -0.11758 | -11.7217 | 8.08E-15 | 8.87E-12 | 23.59908 | Down |
| MGST1   | -2.6608  | -0.31996 | -9.63119 | 3.44E-12 | 5.84E-10 | 17.68903 | Down |
| FMO2    | -2.66226 | 0.016161 | -10.0881 | 8.73E-13 | 2.37E-10 | 19.03136 | Down |
| LMO3    | -2.669   | 0.875372 | -9.53342 | 4.63E-12 | 7.15E-10 | 17.39819 | Down |
| CCL4L2  | -2.66945 | 1.270146 | -5.69834 | 1.08E-06 | 1.51E-05 | 5.269316 | Down |

|          |          |          |          |          |          |          |      |
|----------|----------|----------|----------|----------|----------|----------|------|
| FOS      | -2.68558 | 0.426971 | -4.65427 | 3.25E-05 | 0.000265 | 1.957643 | Down |
| CCL3     | -2.6909  | 1.25943  | -6.10336 | 2.83E-07 | 4.86E-06 | 6.580338 | Down |
| DGAT2    | -2.70185 | -0.45055 | -7.82033 | 1.01E-09 | 4.43E-08 | 12.11649 | Down |
| G0S2     | -2.70464 | 0.061101 | -7.96852 | 6.24E-10 | 3.08E-08 | 12.58582 | Down |
| PKP2     | -2.70936 | -0.43034 | -8.94225 | 2.86E-11 | 2.70E-09 | 15.61385 | Down |
| CA4      | -2.75737 | -0.11302 | -11.0776 | 4.91E-14 | 2.83E-11 | 21.8418  | Down |
| PLEKHA6  | -2.76751 | 0.322726 | -12.0892 | 2.95E-15 | 5.60E-12 | 24.57609 | Down |
| AQP7     | -2.81413 | 0.03235  | -10.6543 | 1.66E-13 | 6.51E-11 | 20.65606 | Down |
| ADH1A    | -2.83172 | -0.48459 | -8.72424 | 5.65E-11 | 4.58E-09 | 14.94502 | Down |
| PLIN4    | -2.85075 | -0.31366 | -9.75711 | 2.35E-12 | 4.58E-10 | 18.06175 | Down |
| AQP7P3   | -2.86512 | -0.06728 | -14.2845 | 1.03E-17 | 2.04E-13 | 30.03655 | Down |
| KLB      | -2.88311 | -0.05634 | -11.4834 | 1.57E-14 | 1.31E-11 | 22.95549 | Down |
| COPG2IT1 | -2.89771 | 0.261306 | -9.31931 | 8.91E-12 | 1.23E-09 | 16.75701 | Down |
| CYP4B1   | -2.95634 | 0.435235 | -9.6622  | 3.13E-12 | 5.45E-10 | 17.781   | Down |
| PLIN1    | -2.96723 | -0.54843 | -10.3456 | 4.08E-13 | 1.35E-10 | 19.77566 | Down |
| LIPE     | -2.97264 | -0.04736 | -10.043  | 9.99E-13 | 2.57E-10 | 18.90031 | Down |
| PCK1     | -2.99724 | -0.57164 | -7.61599 | 1.95E-09 | 7.59E-08 | 11.4662  | Down |
| NPY1R    | -3.0827  | 0.573916 | -11.4642 | 1.65E-14 | 1.33E-11 | 22.90351 | Down |
| TRHDE-A  | -3.13889 | 0.358205 | -9.62101 | 3.55E-12 | 5.92E-10 | 17.6588  | Down |
| TRARG1   | -3.22752 | -0.27896 | -10.8551 | 9.28E-14 | 4.04E-11 | 21.22152 | Down |
| NPR3     | -3.24377 | 0.268079 | -11.0014 | 6.10E-14 | 3.03E-11 | 21.63024 | Down |
| FOSB     | -3.27266 | 1.139342 | -4.4399  | 6.42E-05 | 0.00047  | 1.299753 | Down |
| ADH1B    | -3.40016 | -0.63188 | -8.00038 | 5.63E-10 | 2.89E-08 | 12.68646 | Down |
| CCL8     | -3.6122  | 0.943601 | -9.10551 | 1.72E-11 | 1.90E-09 | 16.11095 | Down |
| APOB     | -4.00156 | -0.01589 | -13.4138 | 9.06E-17 | 6.30E-13 | 27.94621 | Down |
| LEP      | -4.41131 | -0.74322 | -10.1084 | 8.22E-13 | 2.32E-10 | 19.09039 | Down |
