# Supplementary material for: Gene expression and immune infiltration analysis comparing lesioned and preserved subchondral bone in osteoarthritis
Source: PeerJ journal article supplement (doi:10.7717/peerj.17417), 2024-05-28

# A

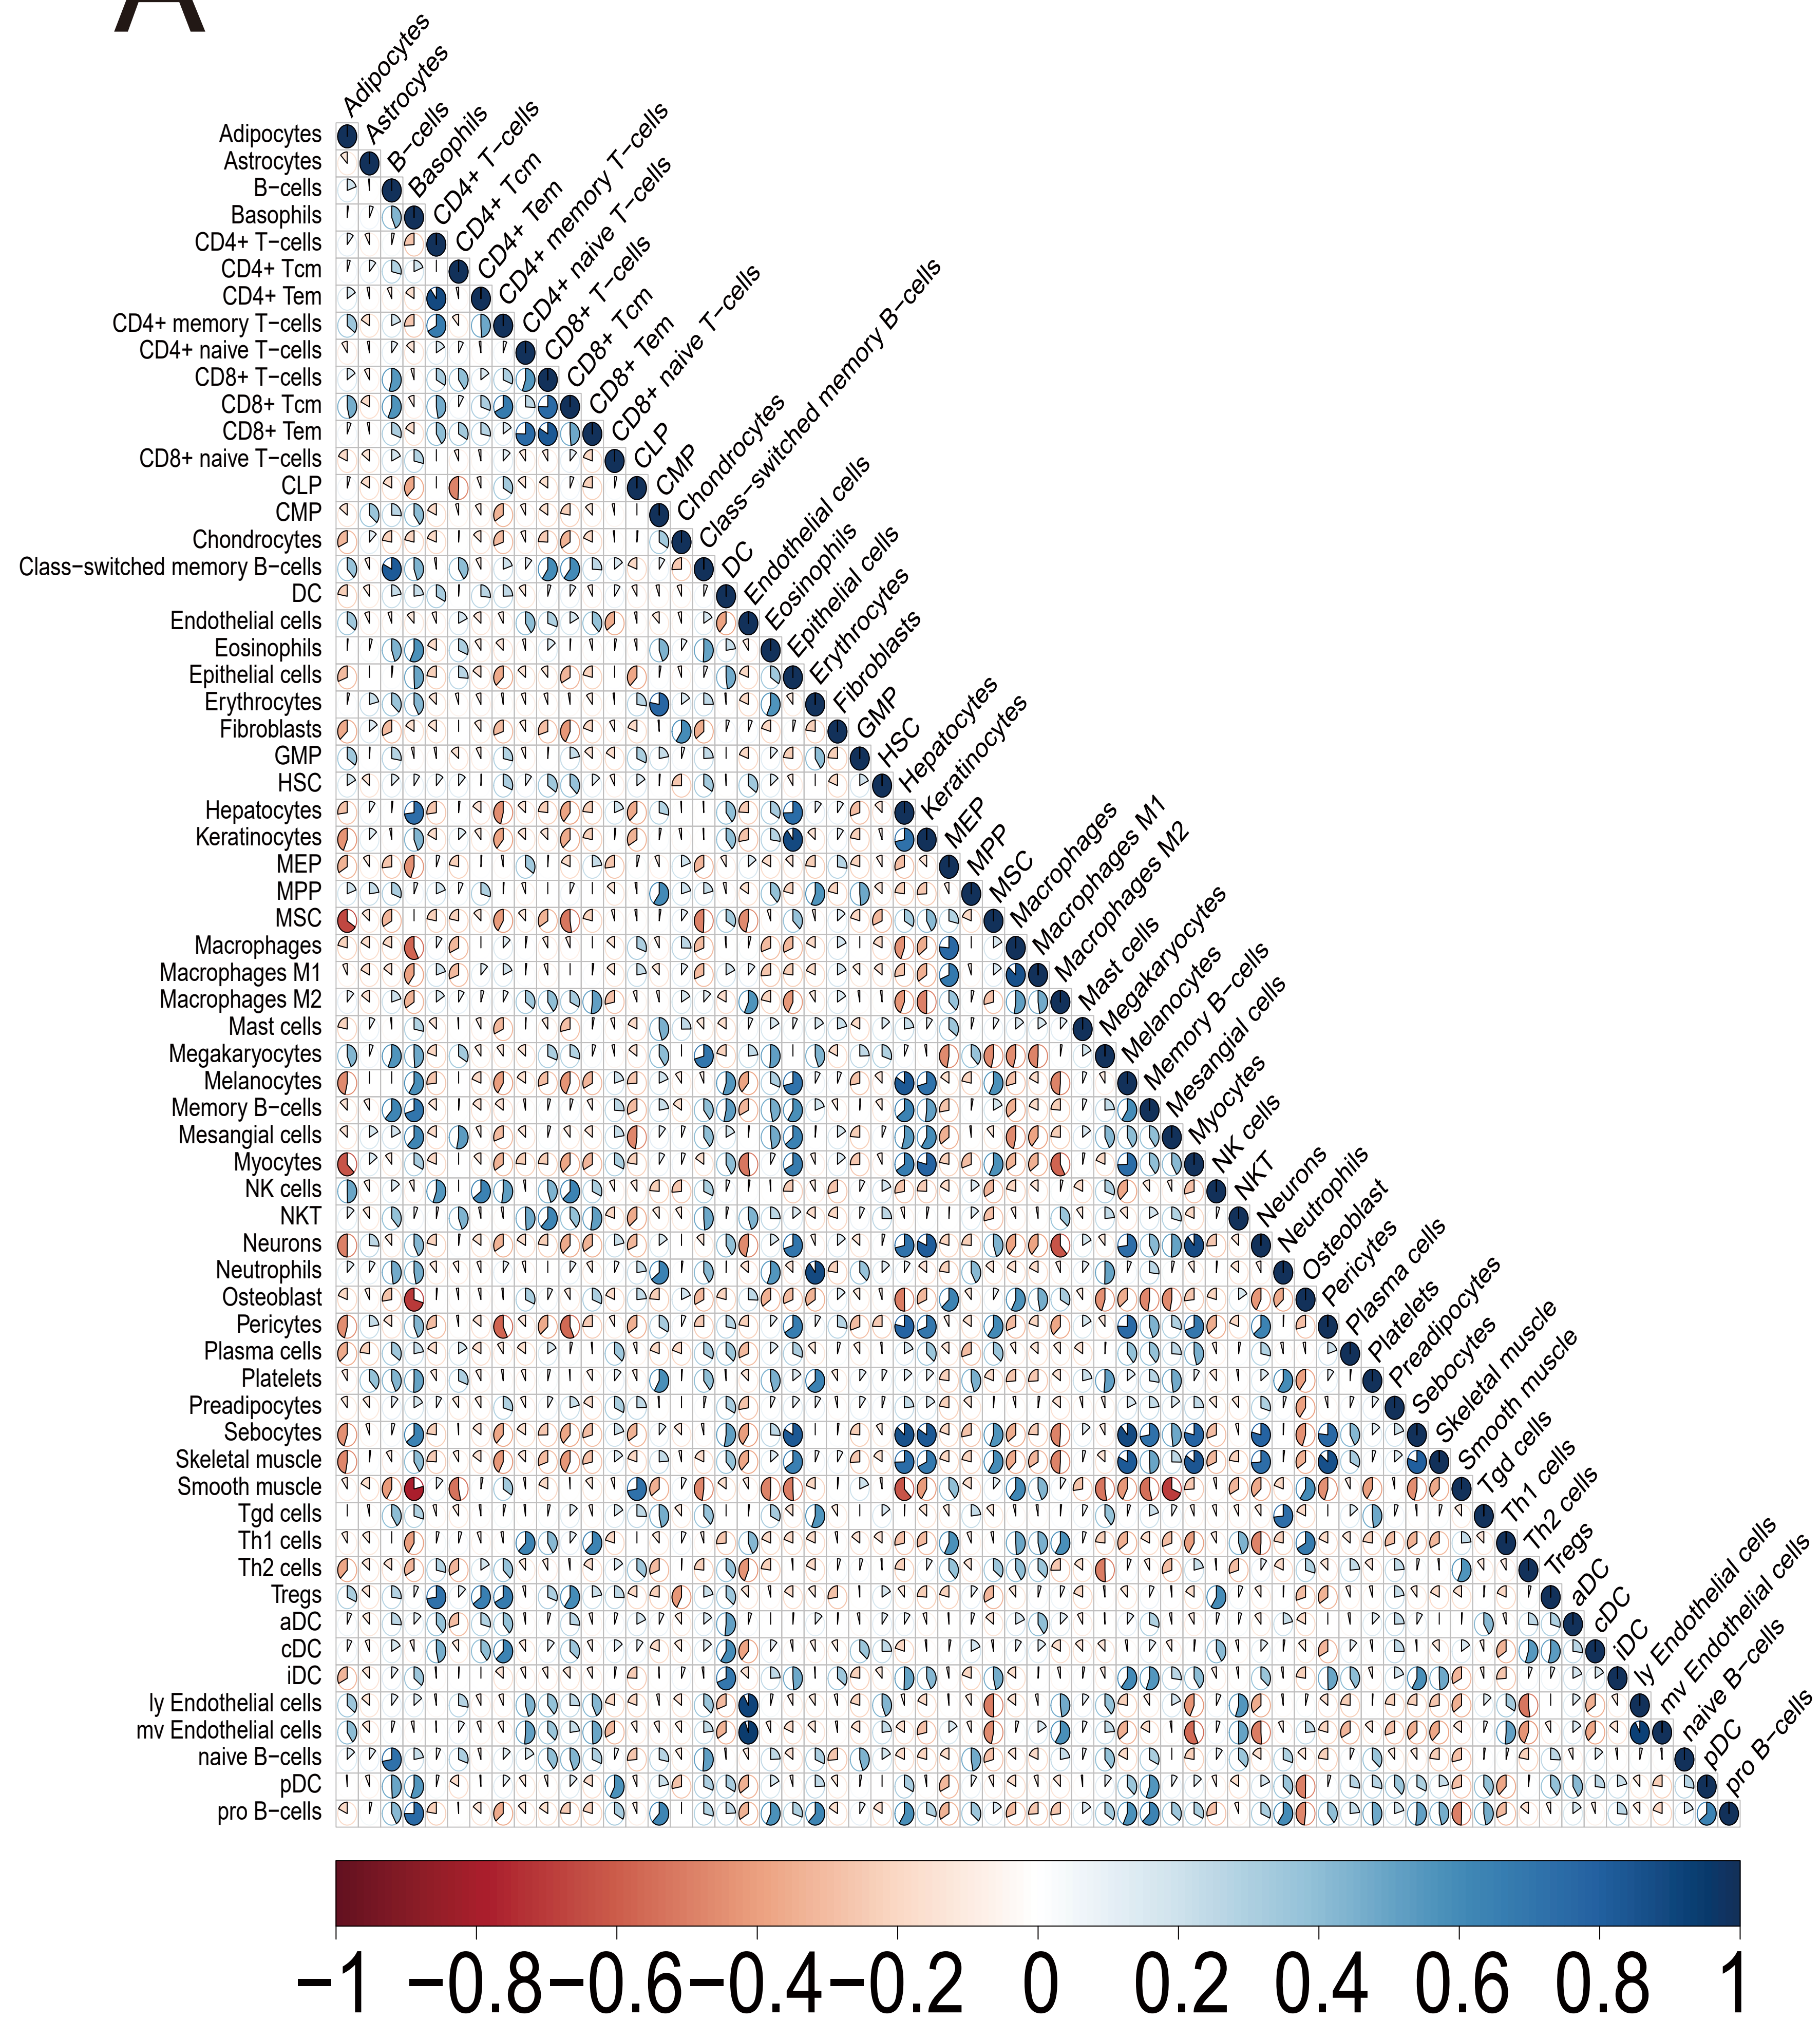

# B

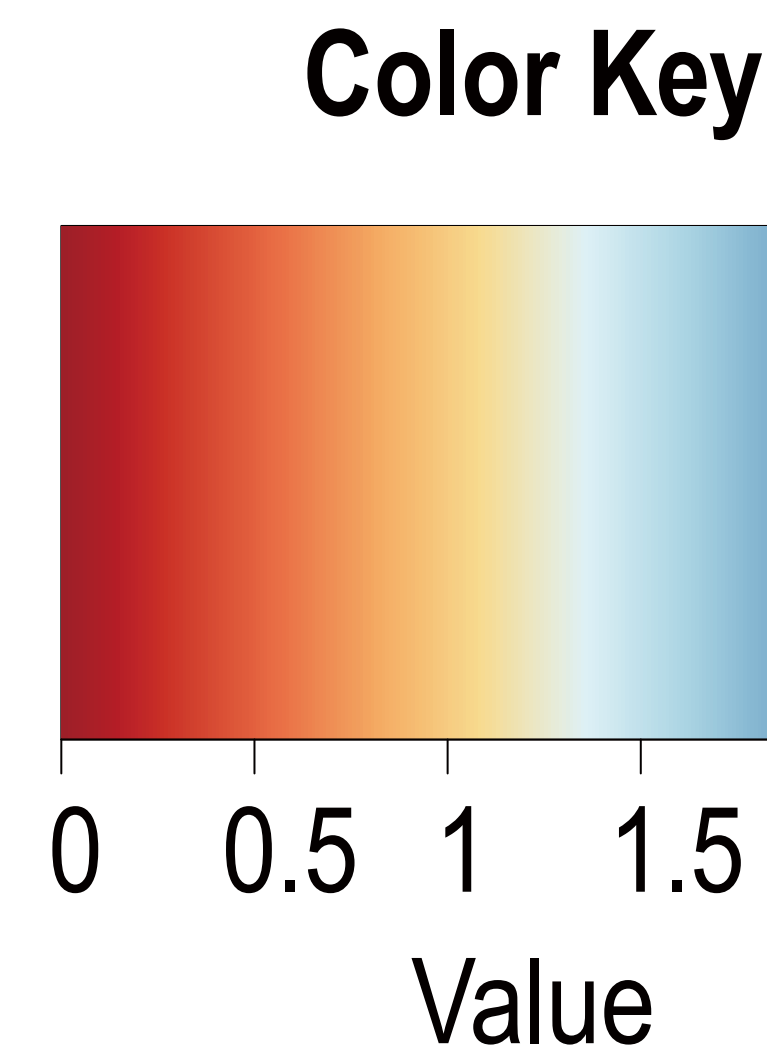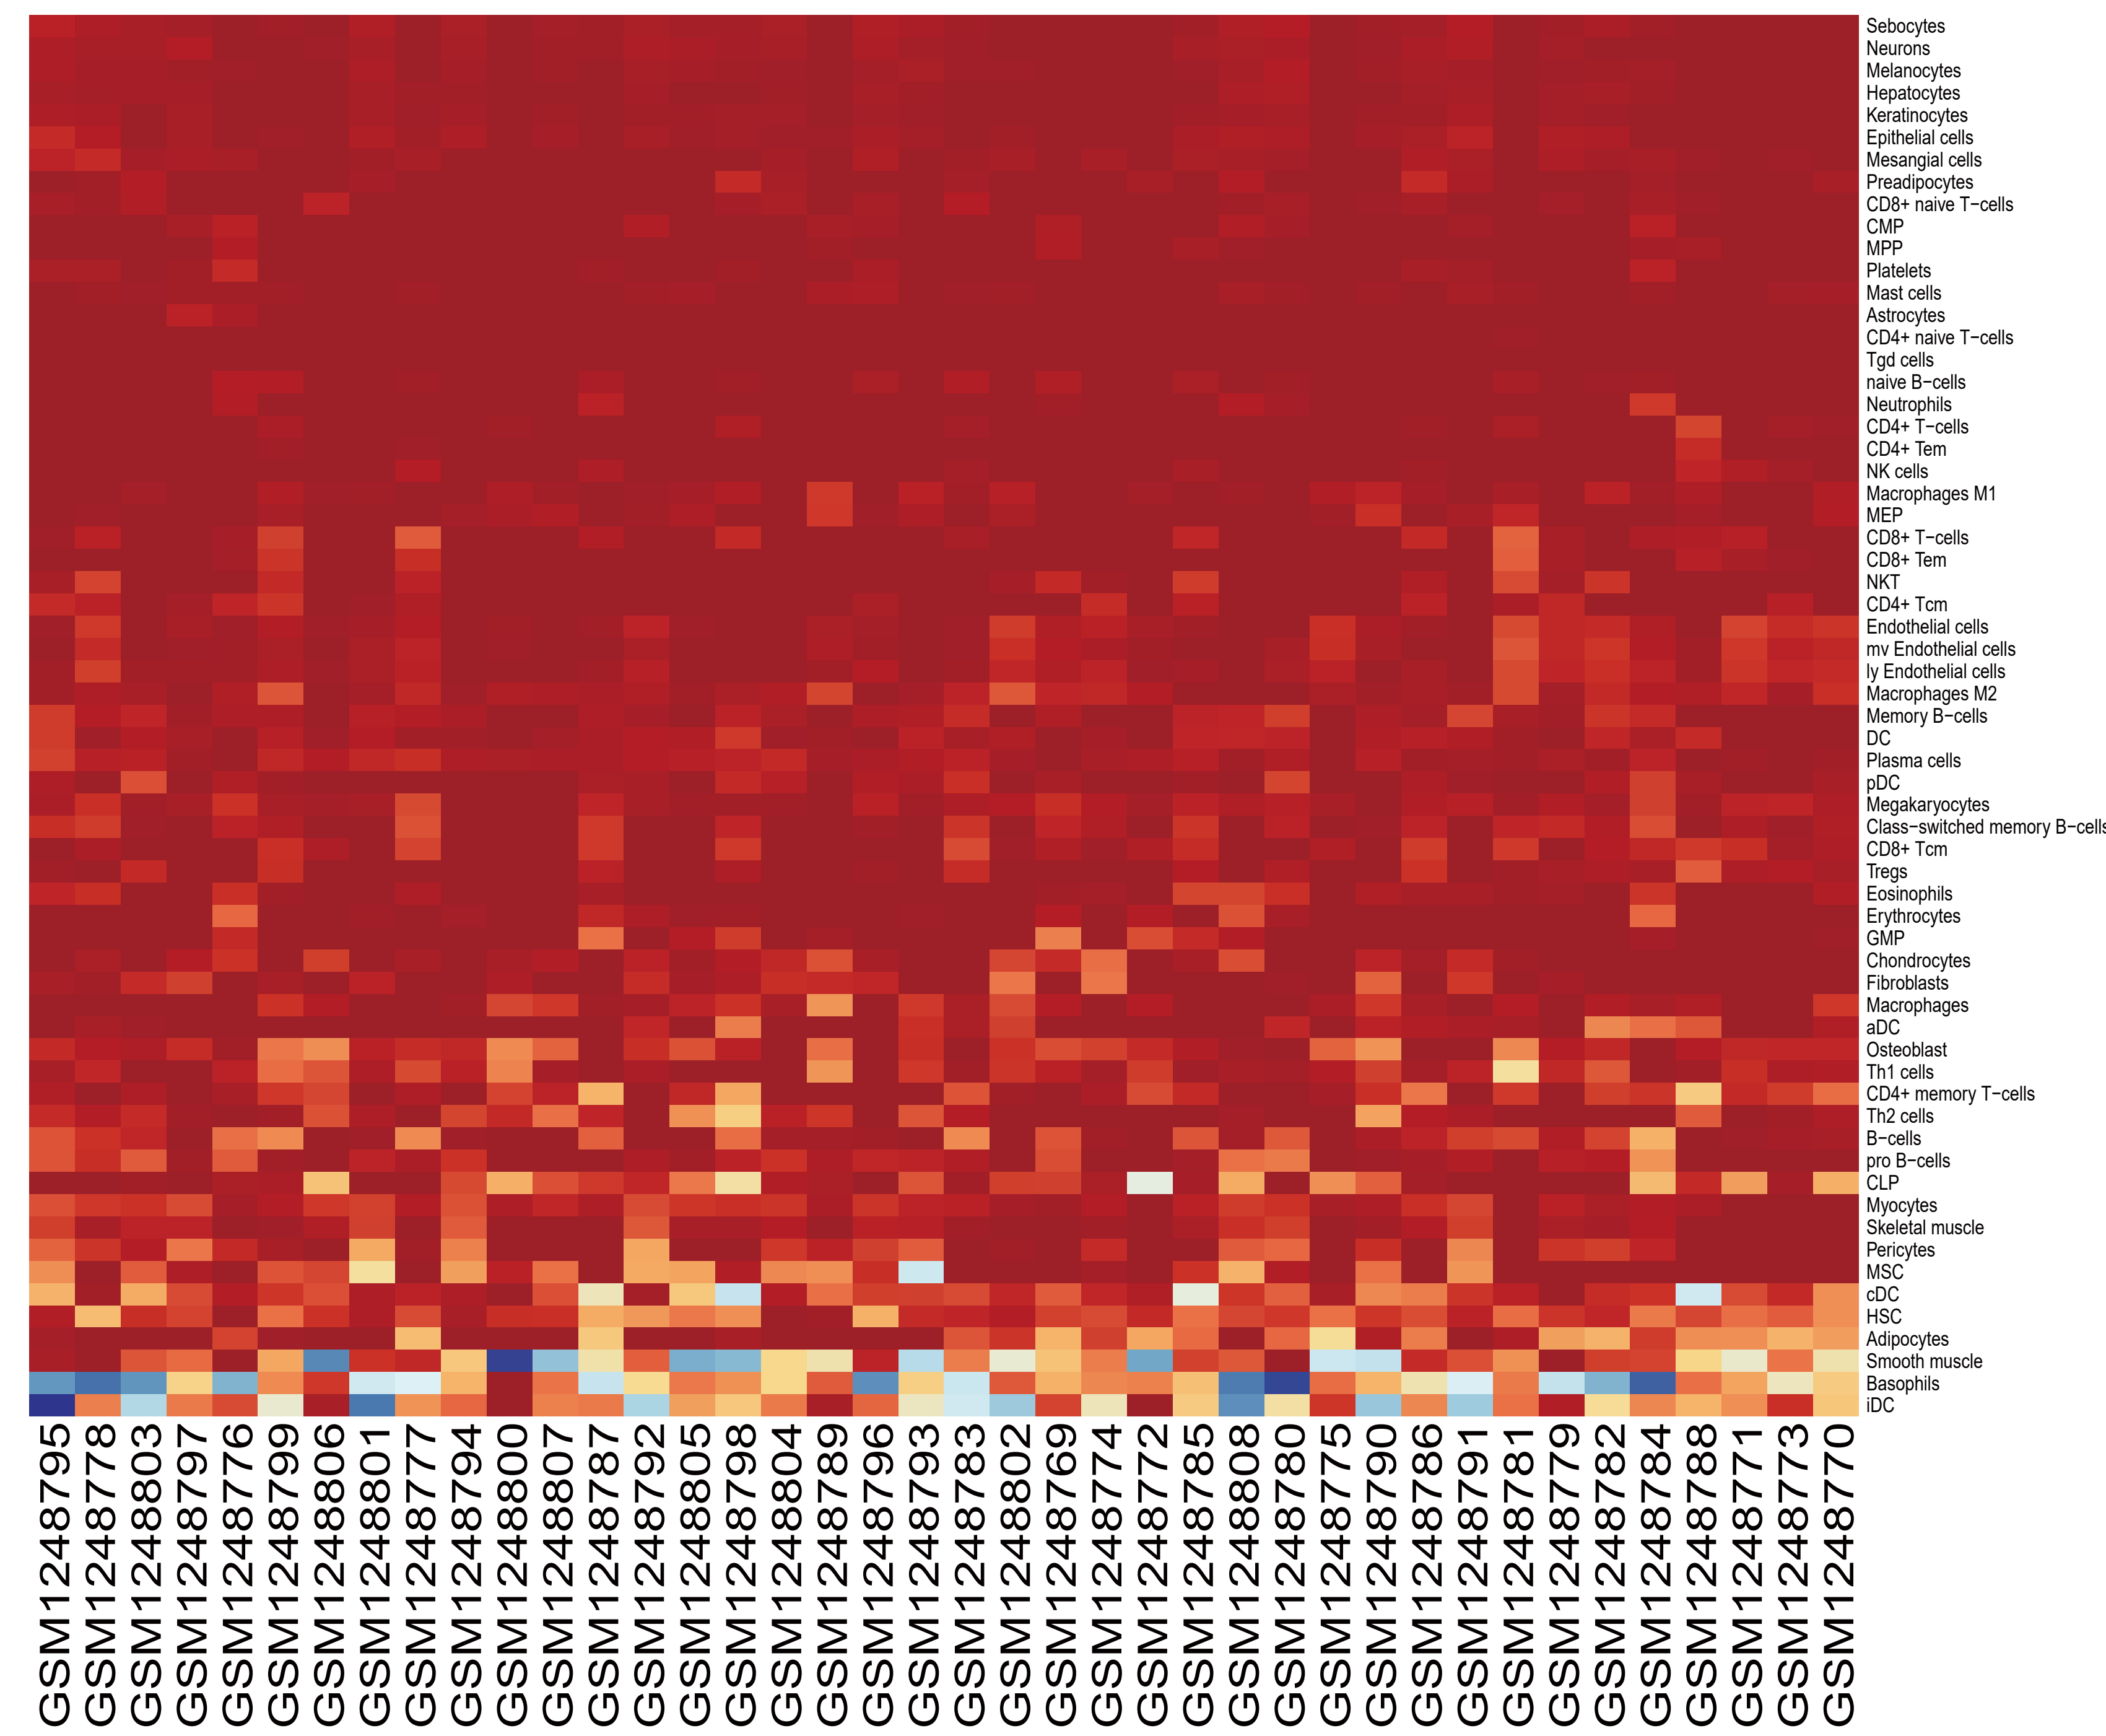

Supplement: Supplementary_Figure_1.pdf [file Supplementary_Figure_1.pdf]
